# Supplementary material
Source: PubMed Central journal article supplement (PMC5637483)
Supplement: NIHMS907491-supplement-Supplemental_Materials.pdf [file NIHMS907491-supplement-Supplemental_Materials.pdf]

SUPPLEMENTAL FIGURES

Figure S1 (related to Figure 1). Highly efficient cortical organoid differentiation derived from multiple hES and iPS cell lines.

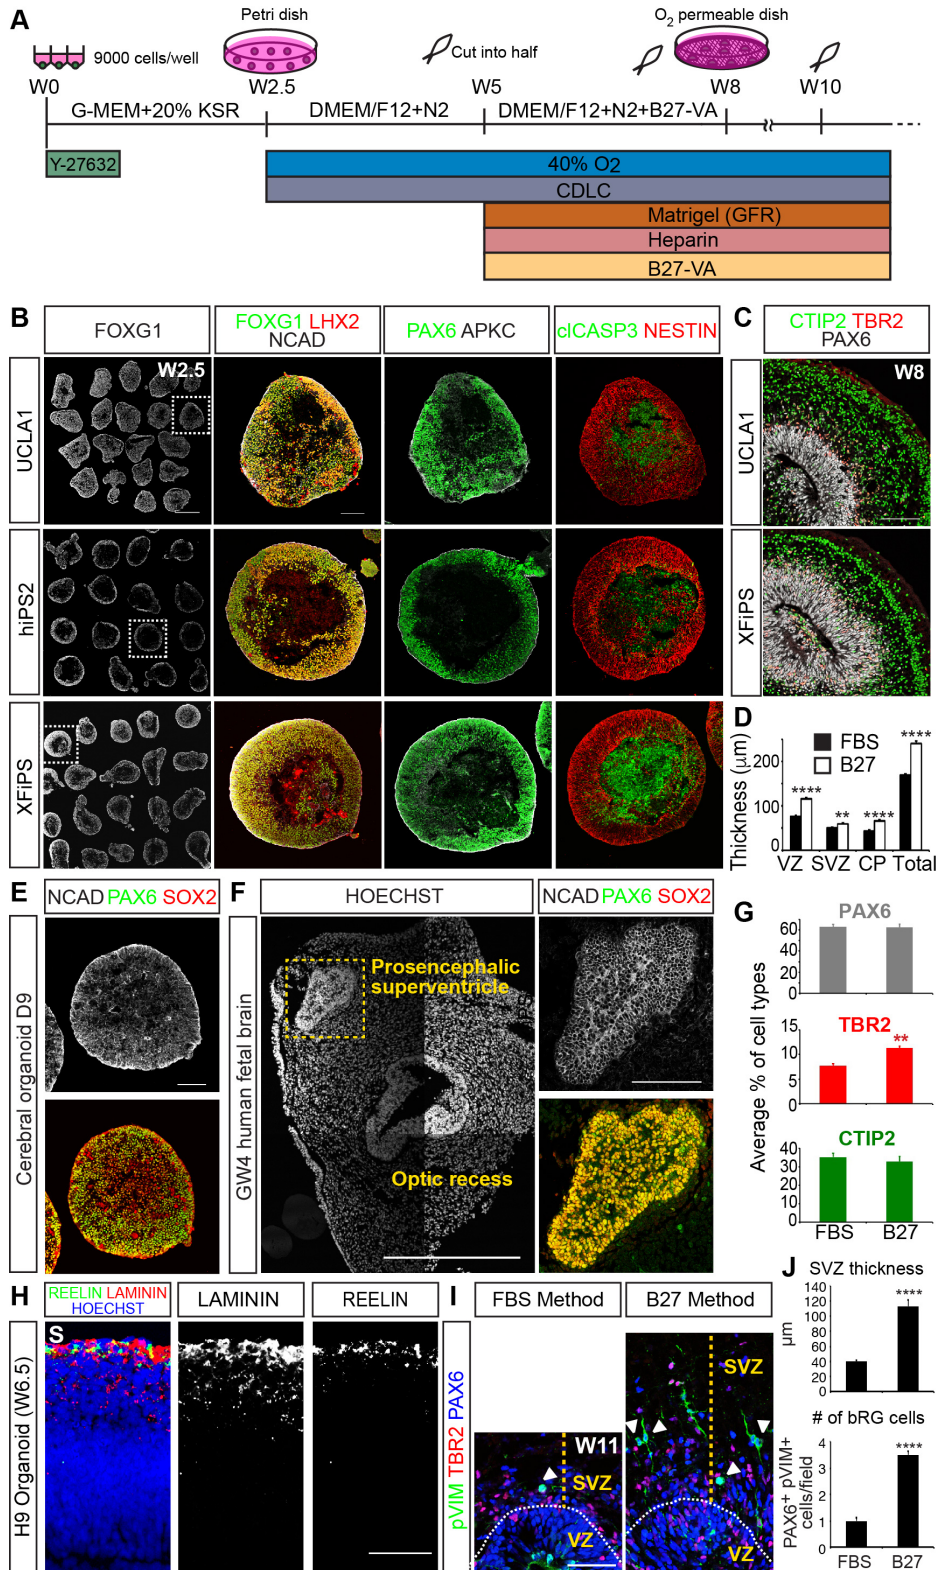

**(A)** Schematic of organoid differentiation protocol. **(B)** W2.5-cerebral organoids derived from three hPS cell lines and immunostained for telencephalic (FOXG1/LHX2/PAX6), progenitor (NESTIN), apical membrane (APKC/NCAD), and cell death (cIASP3) markers. **(C)** W8-cerebral organoids from UCLA1 and XFiPS lines, demonstrating laminar organization of the PAX6<sup>+</sup> VZ, TBR2<sup>+</sup> SVZ, and CTIP2<sup>+</sup> CP regions. **(D/G)** Continued from (Fig. 1D-E). FBS versus B27 media components. Average thickness of cortical zones. Average percentage of cells positive for markers out of total cells per field. Data are represented as mean  $\pm$  SEM. **(E)** Early neuroectodermal organoids at D9 with relatively uniform expression of progenitor markers NCAD, PAX6, and SOX2. **(F)** Sagittal section of GW4 human prospective forebrain region with NCAD, PAX6, and SOX2 markers. **(H)** W6.5-cerebral organoids immunostained for basement membrane (LAMININ) and Cajal-Retzius cells (REELIN). **(I-J)** Comparison of SVZ thickness and bRG cell number in FBS vs B27 media components. Data are represented as mean  $\pm$  SEM. Scale bars: B, F left, 500  $\mu$ m; B right, C, E, F right, 100  $\mu$ m; H, I 50  $\mu$ m.

Figure S2 (related to Figure 1). Comparison of organoid differentiation methods.

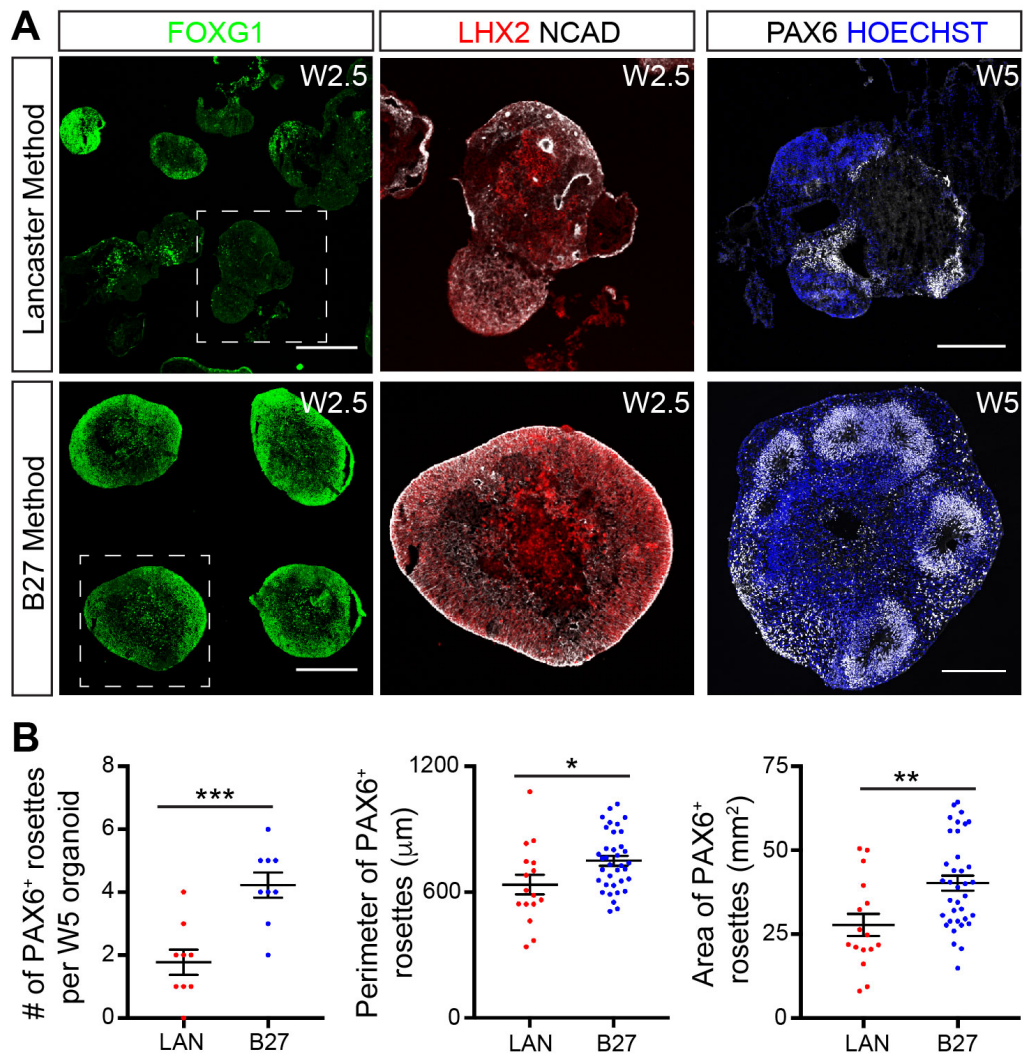

(A) H9 hESC differentiated using Lancaster et al. *Nature* 2013 or B27 method (described in Fig. S1A). W2.5 and W5 organoids stained for forebrain marker (FOXG1), cortical progenitor marker (LHX2), neuroepithelial marker (N-Cadherin), and progenitor marker (PAX6). (B) Quantitative analysis of PAX6<sup>+</sup> neural structures. Data are represented as mean ± SEM. Scale bars: 500 µm.



**Figure S3 (related to Figure 1). Generation of ganglionic eminence organoids with mature interneurons.**

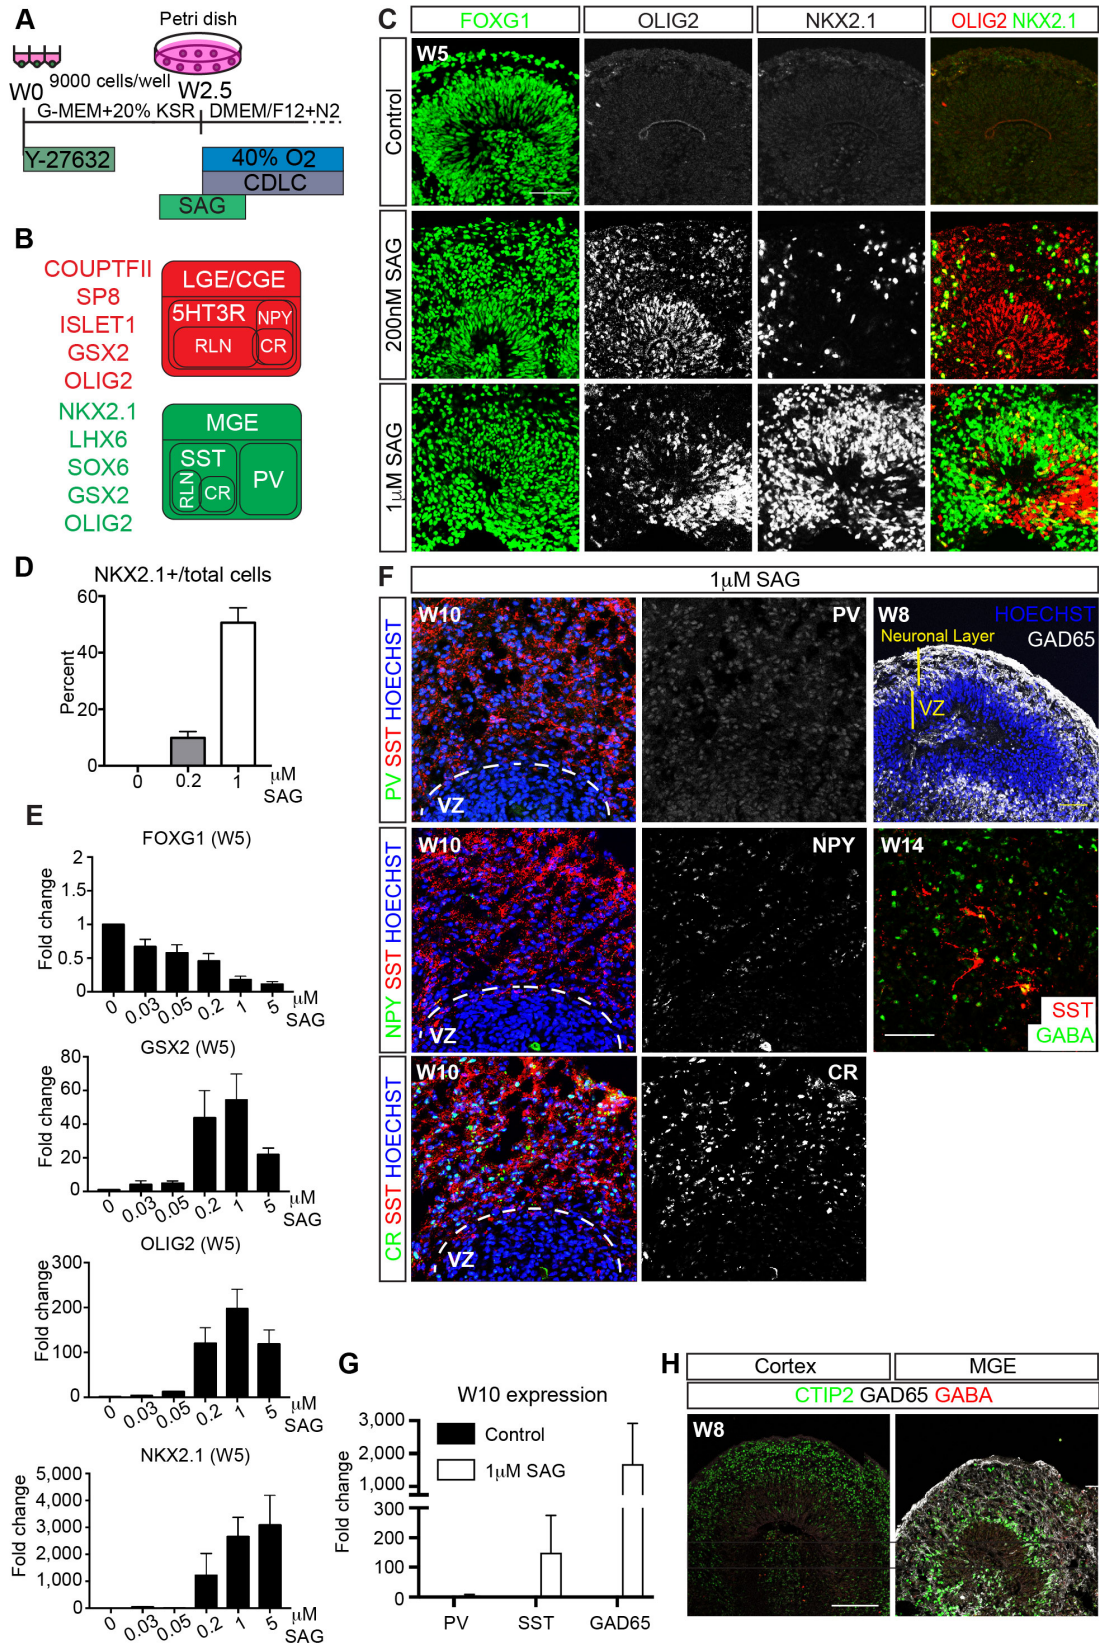



**(A)** Modified cerebral organoid protocol (see Fig. S1A) with addition of SAG from day 15-21 to create LGE/MGE/CGE organoids. **(B)** Schematic of progenitor and interneuronal markers for LGE, MGE, and CGE. **(C)** W5-organoids immunostained for regional markers, FOXG1, OLIG2, and NKX2.1. **(D)** Average number of NKX2.1<sup>+</sup> cells per W5-organoid. n=3. **(E)** RT-qPCR demonstrating upregulation of regional markers in a SAG-dose dependent manner. Fold change relative to control organoids without SAG addition. n=4-10 per condition. Data are represented as mean  $\pm$  SEM. **(F)** MGE/CGE organoids at W10 immunostained for cortical interneuronal markers: SOMATOSTATIN (SST), PARVALBUMIN (PV), NEUROPEPTIDE Y (NPY), and CALRETININ (CR). W8-GE organoids showing laminar structure, with VZ progenitor region and neuronal layer positive for GAD65. W14 MGE organoid immunostained for SST and mature interneuronal marker GABA. **(G)** RT-qPCR for interneuronal markers. Fold change relative to cortical organoids without SAG addition. n=3. **(H)** W8 cortical and ganglionic eminence organoids immunostained for CTIP2, GAD65, and GABA. Note CTIP2 expression in cortical organoids is exclusive of striatal markers. Data in panels D, E, and G are represented as mean  $\pm$  SEM. Scale bars: C, F 50  $\mu$ m.

**Figure S4 (related to Figure 3). STAT3 activation by addition of LIF in cerebral organoids.**

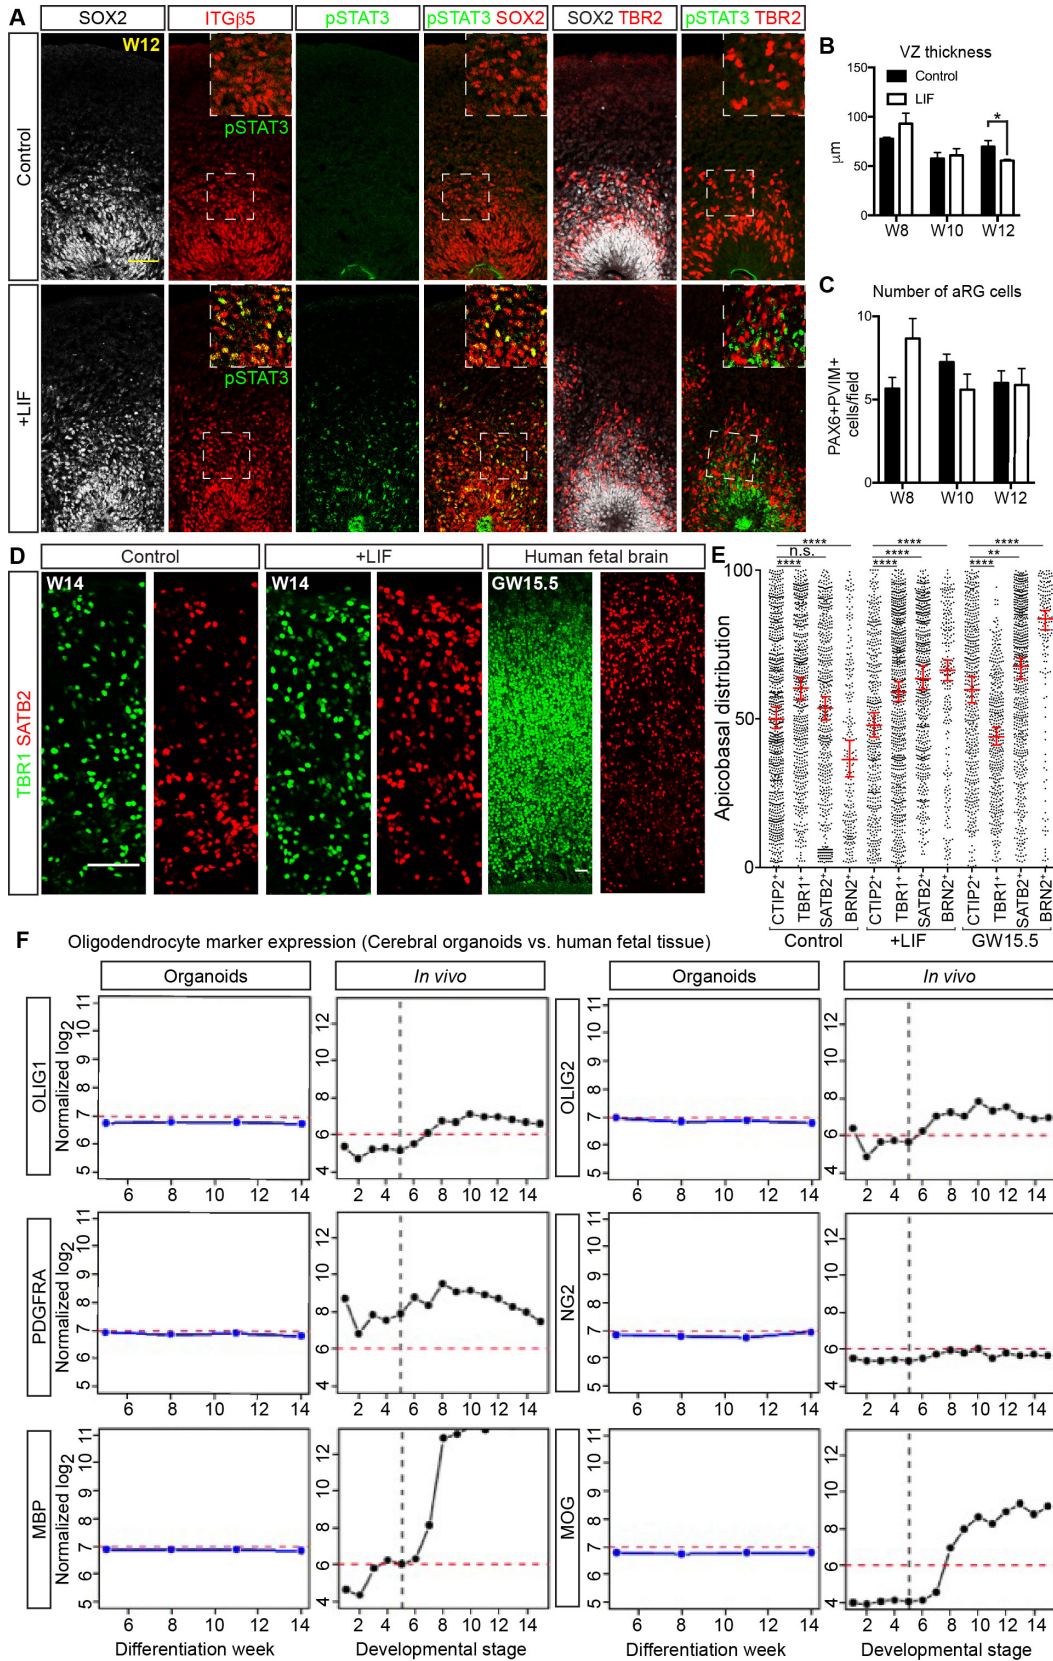

**(A)** Cerebral organoids immunostained for progenitor (SOX2), RG cell (ITG $\beta$ 5), IP (TBR2), and STAT3 activated cell (pSTAT3) markers. **(B)** Continued from Fig. 3D, size of ventricular zone (VZ) in  $\mu\text{m}$ . W8 n=3, W10 Control n=3 LIF n=5, W12 n=7. Data are represented as mean  $\pm$  SEM. **(C)** Continued from Fig. 3D, number of aRG. aRG counted as number of PAX6<sup>+</sup> and pVIM<sup>+</sup> cells dividing at the apical VZ surface. W8 n=3, W10 Control n=4 LIF n=5, W12 Control n=7 LIF n=8. Data are represented as mean  $\pm$  SEM. **(D)** Cerebral organoids immunostained for lower layer neuronal (TBR1) and upper layer neuronal (SATB2) markers. **(E)** Continued from Fig 3F. Relative position of CTIP2<sup>+</sup>, TBR1<sup>+</sup>, SATB2<sup>+</sup> and BRN2<sup>+</sup> neurons. Values represent median  $\pm$  95%CI. Total number of neurons counted from 3 independent experiments, Control: CTIP2<sup>+</sup> n=756, TBR1<sup>+</sup> n=572, SATB2<sup>+</sup> n=538, BRN2<sup>+</sup> n=239; LIF: CTIP2<sup>+</sup> n=479, TBR1<sup>+</sup> n=716, SATB2<sup>+</sup> n=556, BRN2<sup>+</sup> n=230; GW15.5: CTIP2<sup>+</sup> n=492, TBR1<sup>+</sup> n=409, SATB2<sup>+</sup> n=622, BRN2<sup>+</sup> n=161. n.s. no significance, \*\*p < 0.01, \*\*\*p < 0.001, \*\*\*\*p < 0.0001, Statistical analysis compares indicated neuronal marker to the CTIP2<sup>+</sup> group, Kruskal-Wallis test with Dunn's Correction. **(F)** Oligodendrocyte markers OLIG1, OLIG2, PDGFRA, NG2, MBP, and MOG are expressed below threshold in cerebral organoids compared to in vivo expression profiles by microarray analyses. In vivo developmental stages outlined in Fig. 2C. Scale bars: A, D 50  $\mu\text{m}$ .



**Figure S5 (related to Figure 3). Astrocyte production in cortical organoids compared to human neonatal brain tissues.**

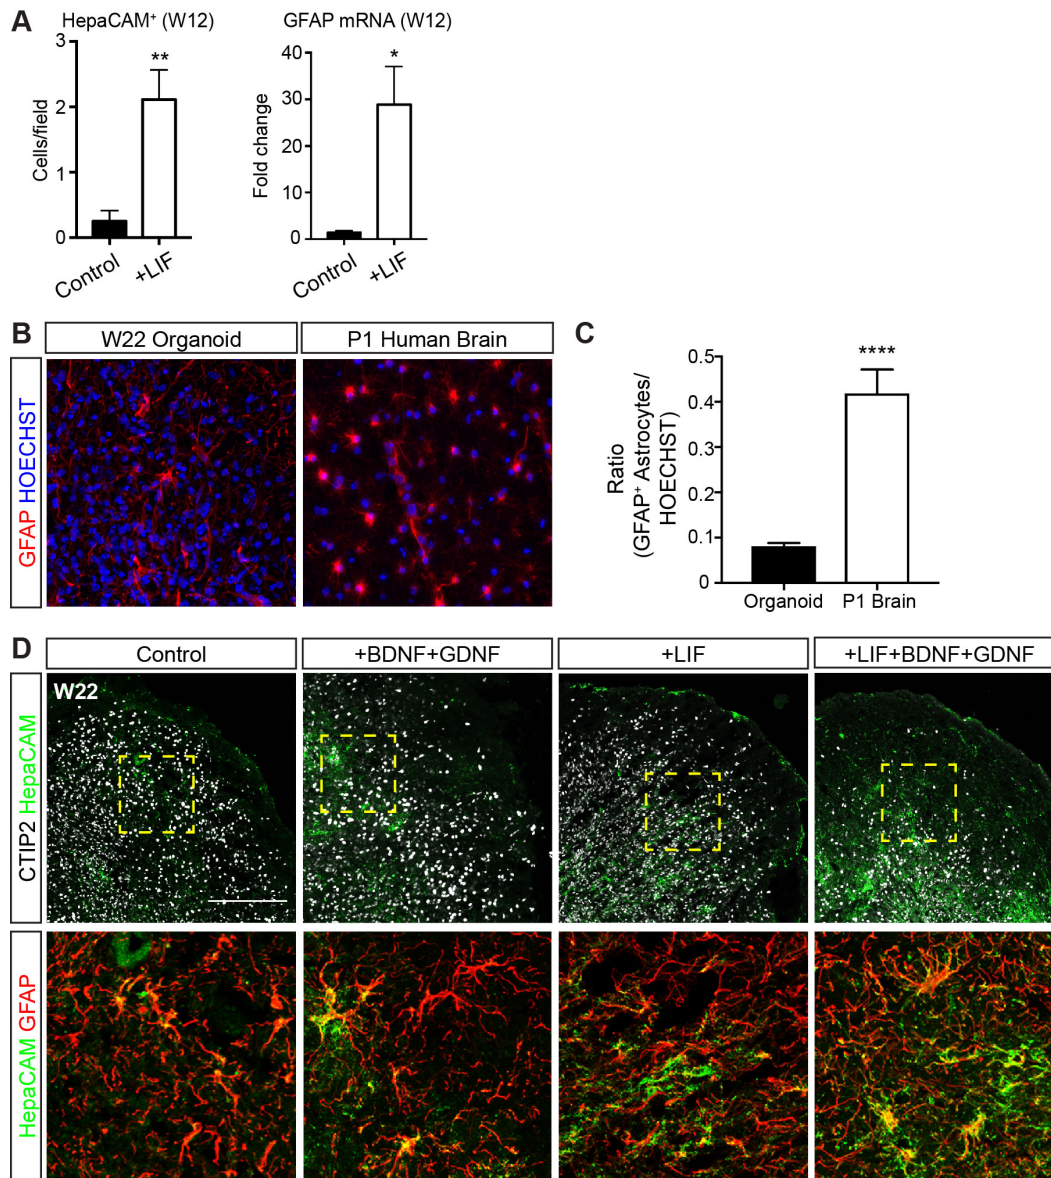

(A) Continued from Fig. 3E. RT-qPCR for GFAP expression. Fold change relative to organoids without LIF treatment ( $n=4$ ) are plotted. Number of HepaCAM<sup>+</sup> star-like astrocytes per field.  $n=8$  control,  $n=9$  LIF treated organoids. Data are represented as mean  $\pm$  SEM. (B-C) Comparison of GFAP<sup>+</sup> astrocyte densities of W22 cortical organoids to post-mortem neonatal (P1) human brain tissue. Chart indicates mean frequency of GFAP expression relative to total number of cells. Data are represented as mean  $\pm$  SEM. (D) Combinatorial actions of growth factors (BDNF/GDNF) and LIF in promoting astrocyte formation (GFAP<sup>+</sup> astrocytes) and maturation (HepaCAM<sup>+</sup> astrocytes). Scale bar: D 200  $\mu$ m.

**Figure S6 (related to Figure 4). Efficient infection with calcium indicator AAV1-SYN::GCaMP6f and spontaneous ensemble neuronal activities in cerebral organoids.**

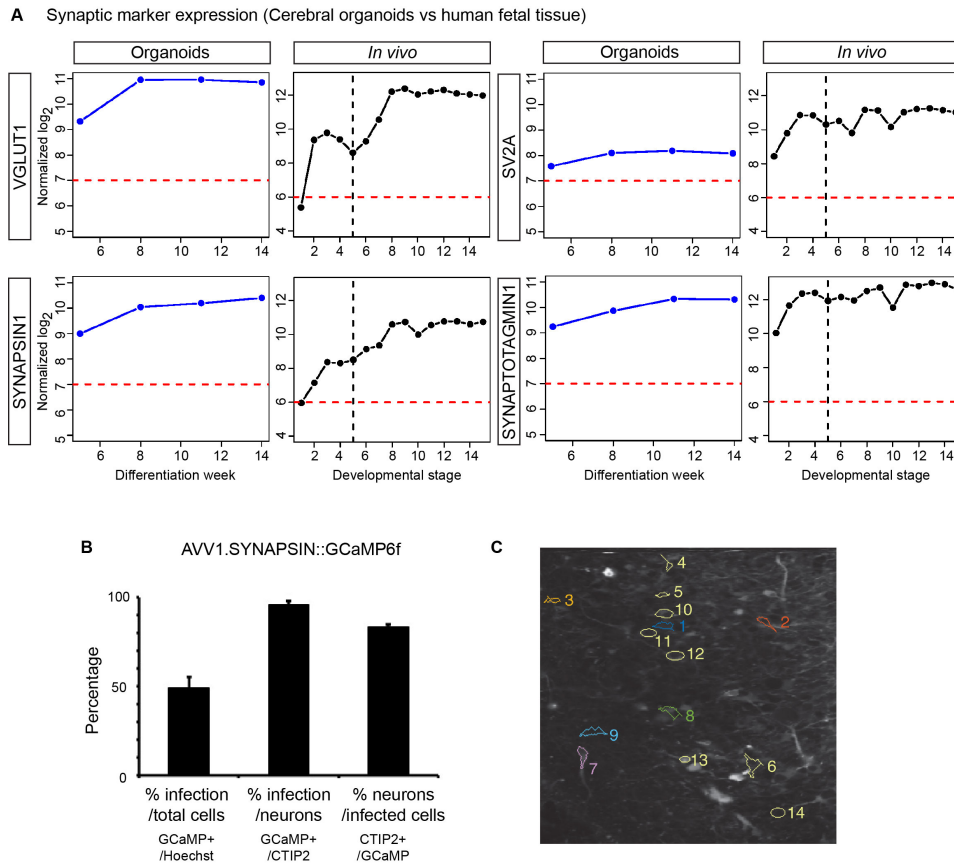

(A) Synaptic markers VGLUT1, SV2A, SYNAPSIN1, and SYNAPTOTAGMIN1 were expressed above threshold in cerebral organoids by microarray analyses. In vivo expression profiles also showed high expressions of these synaptic markers. In vivo developmental stages outlined in Fig. 2C. (B) Infection efficiency of adeno-associated virus AVV1-SYNAPSIN::GCaMP6f. Percentage of total cells (GCaMP<sup>+</sup>/HOECHST), percentage of neurons infected (GCaMP<sup>+</sup>/CTIP2<sup>+</sup>), and percentage of neurons out of infected cells (CTIP2<sup>+</sup>/GCaMP<sup>+</sup>) n=3. Data are represented as mean  $\pm$  SEM. (C) Mean field of view of one organoid during two-photon imaging and detected neuronal segments exhibiting fast calcium transients. These 14 segmented neurons were used for the analyses in Fig. 4H-J. Color-coded segments correspond to example traces in Fig. 4H. See also Movie S1.

**Figure S7 (related to Figure 5). Expression profiles of ZIKV susceptibility receptors and impact of ZIKV on cultured spinal cord and cortical progenitors.**

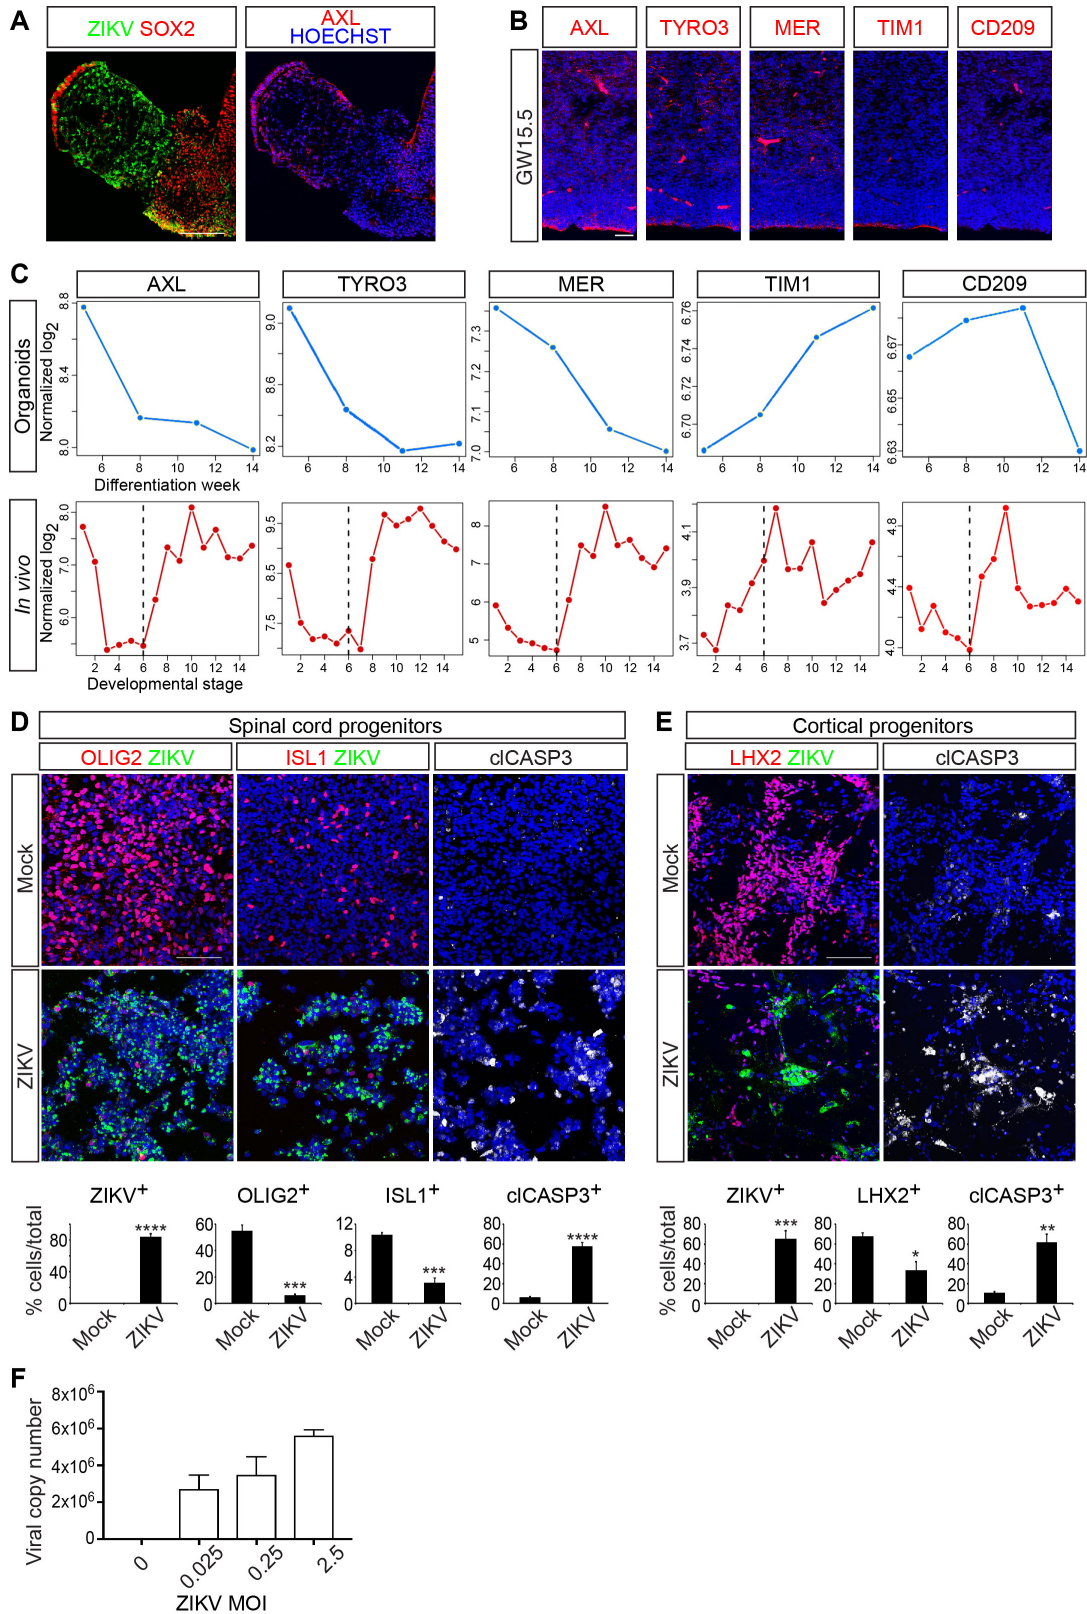



**(A)** Continued from Fig. 5B. The choroid plexus-like structure highly positive for ZIKV and AXL, but negative for SOX2. **(B)** VZ/SVZ regions of GW15.5 human fetal brain stained with HOECHST and antibodies against the ZIKV candidate receptors AXL, TYRO3, MER, TIM1, and CD209. **(C)** Expression of ZIKV candidate receptors in different weeks of cerebral organoids and in vivo developmental stages by microarray analyses. In vivo developmental stages are outlined in Fig. 2C. **(D)** W3-spinal cord progenitors infected with ZIKV. Cells were stained with HOECHST (blue) and antibodies recognizing ZIKV, motor neuron progenitors (OLIG2), differentiated motor neurons (ISL1), and the cell death marker cIASP3. The percentages of the total cell population expressing ZIKV envelope, OLIG2, ISL1, and cIASP3 with and without ZIKV infection are displayed. n=3 experiments. **(E)** Cortical progenitors infected with ZIKV. W6-organoids were dissociated and plated in an adherent culture for infection. Cells immunostained for ZIKV, telencephalic marker (LHX2), and cell death (cIASP3). The percentages of the total cell population expressing ZIKA envelope, LHX2, and cIASP3 are displayed. n=3 experiments. **(F)** RT-qPCR results of viral copy numbers in W3 organoids collected 3 days post infection with various MOI of ZIKV. Data in panels D-F are represented as mean  $\pm$  SEM. All scale bars: 100  $\mu$ m.

**Figure S8 (related to Figure 6). Transcriptomic analyses of cerebral organoids infected with ZIKV by RNA sequencing.**

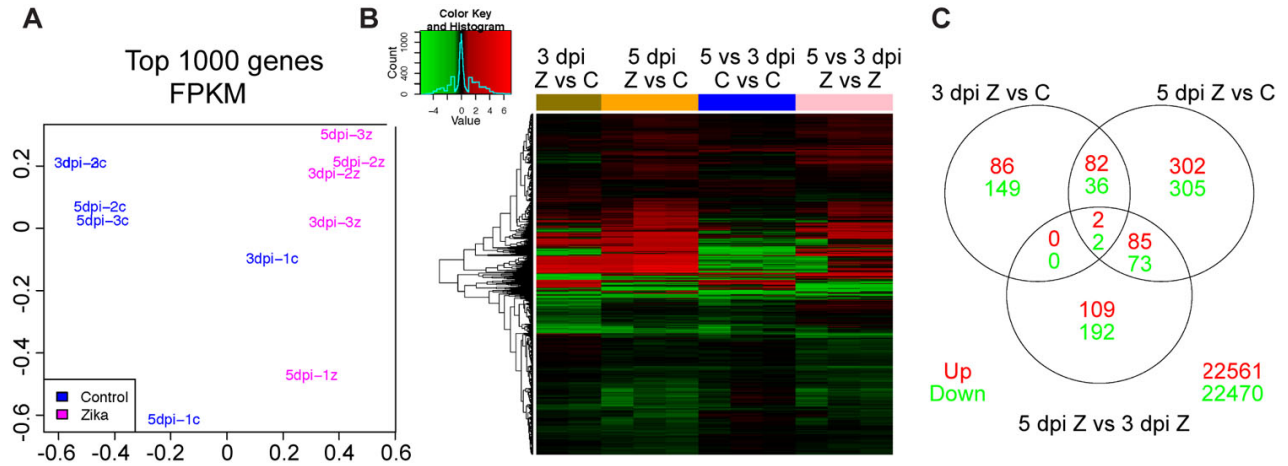

W8 organoids were infected with ZIKV and analyzed at 3 and 5 days post infection (dpi). Each condition had n=3 independent replicates. One outlier (a 3-day control) was removed from the analysis. **(A)** Multiple-dimensional scaling using Fragments Per Kilobase of transcript per Million mapped reads (FPKM) values showed that expression changes associated with ZIKV infection drive most of the observed variability in gene expression. **(B)** Heatmap and clustering of differentially expressed at  $p < 0.005$ . Green color in the heatmap indicates downregulated, and red upregulated transcripts, Z=ZIKV and C=control. **(C)** Venn diagram of the transcripts dysregulated by ZIKV at 3 and 5 days (top 2 circles) and ZIKV at 5 dpi vs. ZIKV at 3 dpi (bottom circle). Upregulated and downregulated transcripts are in red and green, respectively.

**Figure S9 (related to Figure 7). Comparison of the efficacy of different agents in blocking ZIKV infection of cerebral organoids.**

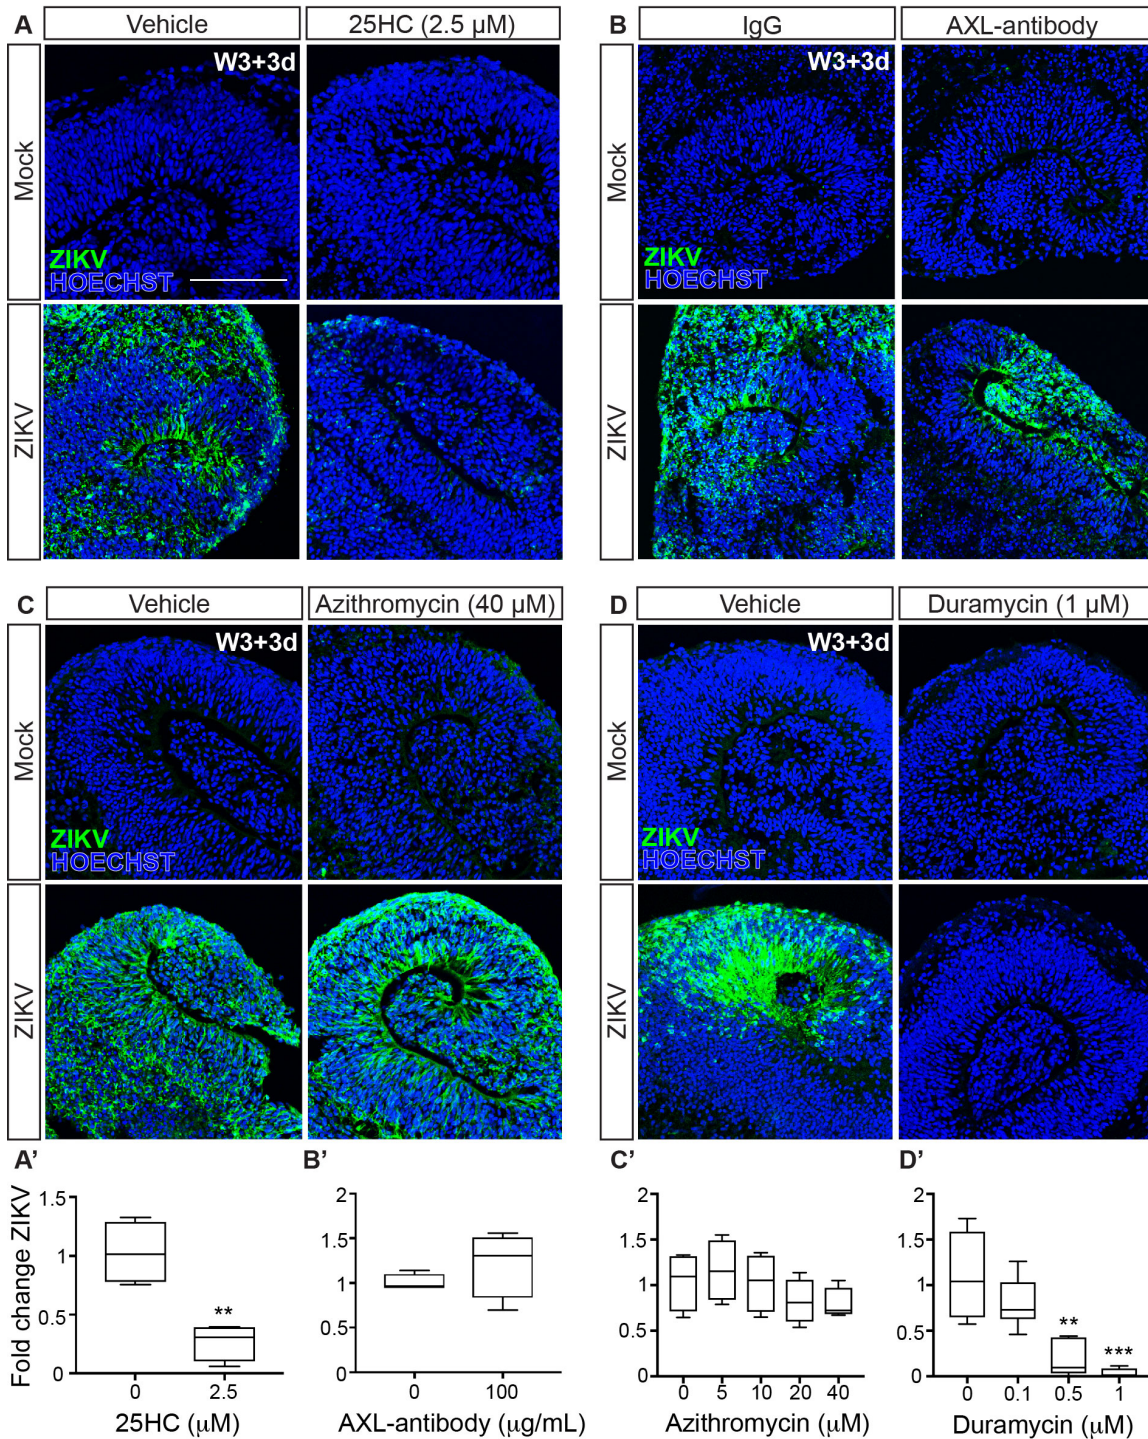

Cerebral organoids immunostained for ZIKV 3dpi in the absence or presence of (A) 25HC, (B) AXL-antibody, (C) Azithromycin, and (D) Duramycin. Scale bar: 100  $\mu$ m. (A'-D') qPCR analysis of ZIKV expression. Plots represent expression levels normalized to ZIKV-vehicle average. Data are represented as mean  $\pm$  SEM. (A') 25HC n=4, (B') AXL-antibody n=4, (C') Azithromycin n=4, and (D') Duramycin n=6. See also Table S5 for statistical analysis details.



SUPPLEMENTAL TABLES

**Table S1 (related to Figure 2). Summary of High-Confidence Modules in Human Fetal Cortex and Cerebral Organoid**

| Module Number | Module Color   | In vivo Pzscore                                                     | Organoid Pzscore | Select Hub Genes                                          |
|---------------|----------------|---------------------------------------------------------------------|------------------|-----------------------------------------------------------|
| 4             | Magenta        | 17.0                                                                | 29               | BUB1, BUB1B, KIF20A                                       |
| 3             | Red            | 21.0                                                                | 23               | ACTL6A, HIST1H3H, HIST1H2BM, BUB3, CDK4, CNOT1, SRSF1     |
| 8             | Salmon         | 14.0                                                                | 18               | GRIN1, GRID1, SLC1A1, CAMK2 <sup>ab</sup> , VAMP2, SYT3/5 |
| 14            | Purple         | 10.0                                                                | 18               | SEMA4G, SEMA6C, CRMP1, SRGAP1, DCX                        |
| 27            | Cyan           | 4.1                                                                 | 16               | NRXN1, PCLO, ANK2/3, MAPT, MYO5A, KIF3B/C, DOCK9          |
| 5             | Pink           | 15.0                                                                | 16               | HES1, NOTCH2, FGFR3, RFX4                                 |
| 11            | Lightgreen     | 12.0                                                                | 14               | GABRA2/5, GABRG2/3, GLRB, SNAP25, SYT1, SV2A              |
| 2             | Green          | 28.0                                                                | 12               | GRIA4, GRIK4, GRIN3A, SHANK2, RIMS1, SV2B, CACNA1I        |
| 15            | Grey60         | 9.8                                                                 | 5.7              | THOC1, RBM39, PNN, MRE11A, POLA1, POLE, CNTRL             |
| 20            | Paleturquoise  | 5.8                                                                 | 5.2              | CACNA2D2, CHRFA7A, SLC24A2                                |
| 18            | Darkred        | 5.9                                                                 | 4.8              | DKK1, BOK, RNF152                                         |
| 6             | Turquoise      | 15.0                                                                | 4.4              | KLHL9, CRNKL1, CREB1, HDAC2, SENP1                        |
| 19            | Lightcyan      | 6.3                                                                 | 3.1              | LAMA2/4, COL3A1, COL1A1/2, BMP4, SMAD6                    |
| 23            | Darkturquoise  | 5.0                                                                 | 1.5              | NAPA, SORT1, AP2M1, ARF1, MAPK3                           |
| 7             | Midnightblue   | 14.0                                                                | 1.1              | MLL1/4/5, CHD2/3, SMARCA4, CREBBP, FOXG1                  |
| 1             | Yellow         | 31.0                                                                | 0.92             | CAMK2A, GRIK1, GFAP, AQP4, CX3CL1                         |
| 9             | Tan            | 13.0                                                                | 0.91             | STAT6, TGFB2/3, CXCL12, CALCRL, TGM2                      |
| 26            | Darkolivegreen | 4.5                                                                 | 0.4              | COPA, COPE, COPG, VPS11, VAC14, SNAP29                    |
| 16            | Skyblue3       | 8.8                                                                 | 0.38             | SLC17A7, PCDH9, CNTNAP5, ARHGAP44, MGLL                   |
| 25            | Greenyellow    | 4.7                                                                 | -0.083           | RBFOX1, LUC7L3, CAPRN2                                    |
| 12            | Orange         | 11.0                                                                | -0.5             | CX3CR1, TYROBP, LAPTM5, CSF1R                             |
| 10            | Black          | 12.0                                                                | -2.4             | BTN3A3, CFB, CTSS, DHX58, HERC5                           |
| Module Number | Module Color   | Biological Processes Associated with Module                         |                  |                                                           |
| 4             | Magenta        | Mitosis and cell cycle regulation of neural progenitors             |                  |                                                           |
| 3             | Red            | Mitosis, RNA processing and RNA splicing                            |                  |                                                           |
| 8             | Salmon         | Glutamatergic synaptic transmission, axon and dendrite development  |                  |                                                           |
| 14            | Purple         | Axon guidance and GTPase activity                                   |                  |                                                           |
| 27            | Cyan           | Synapse assembly and vesicle transport by actin/microtubule motors  |                  |                                                           |
| 5             | Pink           | Neural progenitor proliferation and gliogenesis                     |                  |                                                           |
| 11            | Lightgreen     | GABAergic synaptic transmission and synaptic vesicle exocytosis     |                  |                                                           |
| 2             | Green          | Glutamatergic synaptic transmission, axon and dendrite development  |                  |                                                           |
| 15            | Grey60         | RNA splicing, DNA repair and cell cycle                             |                  |                                                           |
| 20            | Paleturquoise  | Synaptic transmission                                               |                  |                                                           |
| 18            | Darkred        | Programmed Cell Death                                               |                  |                                                           |
| 6             | Turquoise      | Ubiquitin proteolysis, RNA processing and splicing                  |                  |                                                           |
| 19            | Lightcyan      | Extracellular matrix and basement membrane, blood vessel develop.   |                  |                                                           |
| 23            | Darkturquoise  | Intracellular protein transport, vesicle and endosome trafficking   |                  |                                                           |
| 7             | Midnightblue   | Histone modification and chromatin remodeling                       |                  |                                                           |
| 1             | Yellow         | Synaptic transmission, gliogenesis and neuron microglia interaction |                  |                                                           |
| 9             | Tan            | Reg. of cell death, gliogenesis, immune and inflammatory processes  |                  |                                                           |
| 26            | Darkolivegreen | Intracellular protein transport, vesicle and endosome trafficking   |                  |                                                           |
| 16            | Skyblue3       | Neuronal, synaptic with parietal areal identity                     |                  |                                                           |
| 25            | Greenyellow    | RNA binding                                                         |                  |                                                           |
| 12            | Orange         | Immune response, neuron-microglia interaction                       |                  |                                                           |
| 10            | Black          | Immune response                                                     |                  |                                                           |

Module preservation Z scores are shown for developing human cortex and cerebral organoids (W5 vs W14). Modules not preserved in organoids are highlighted in pink and modules preserved in both in vivo and in vitro are highlighted in green. Some modules with few genes (<70) lacking clear GO enrichment are preserved in vivo (white, steelblue, saddlebrown, yellowgreen, and violet), but not shown here. For detailed explanation, see Stein et al., 2014.

**Table S2 (related to Figure 6). Top 50 Upregulated Transcripts upon ZIKV infection at 3 and 5 dpi**

| Transcript | 3 dpi ZIKV vs Control | Transcript | 5 dpi ZIKV vs Control |
|------------|-----------------------|------------|-----------------------|
| SAMD9      | 4.753351054           | OAS2       | 6.323266235           |
| SAMD9L     | 4.554938175           | OAS1       | 6.021227692           |
| CCL5       | 4.359314              | OAS3       | 5.940906319           |
| OAS1       | 4.143859296           | IFNB1      | 5.905361296           |
| OAS3       | 4.111865889           | SAMD9      | 5.789032826           |
| IFIT3      | 4.04078647            | CXCL11     | 5.692781558           |
| MX1        | 4.032918155           | CCL5       | 5.650141418           |
| IFIT2      | 4.027343073           | MX1        | 5.510042181           |
| APOL6      | 3.893887571           | IFIT3      | 5.255483595           |
| IFIT1      | 3.751789987           | SAMD9L     | 4.920016749           |
| NLRC5      | 3.67156849            | IFIT1      | 4.802510386           |
| OAS2       | 3.670840265           | IFIT2      | 4.788387276           |
| CETP       | 3.628899582           | ISG15      | 4.682414836           |
| ISG15      | 3.591420312           | APOL6      | 4.60053119            |
| EPSTI1     | 3.51701378            | IFI6       | 4.522604346           |
| IFIH1      | 3.50916866            | RSAD2      | 4.501210753           |
| PSMB9      | 3.385254396           | IFIH1      | 4.325888388           |
| CXCL11     | 3.287714624           | RTP4       | 4.164585412           |
| RSAD2      | 3.248432975           | EPSTI1     | 4.140104287           |
| CMPK2      | 3.143771397           | NLRC5      | 4.130342071           |
| RTP4       | 3.10090871            | CH25H      | 4.086323415           |
| ETV7       | 3.093105384           | CSAG1      | 4.072637577           |
| DDX58      | 3.064415012           | AMELX      | 4.0661765             |
| DDX60L     | 3.058867118           | HLA-F      | 4.0634779             |
| IFI6       | 3.045716203           | BATF2      | 4.002454516           |
| PARP12     | 3.045020356           | PSMB9      | 3.899302166           |
| NRIR       | 3.017409598           | EPHA1-AS1  | 3.859016281           |
| CXCL1      | 2.976721457           | SP100      | 3.819080243           |
| HLA-F      | 2.959126403           | CMPK2      | 3.792209462           |
| SP110      | 2.911714523           | NRIR       | 3.745833147           |
| PLSCR1     | 2.838427277           | PARP12     | 3.676653659           |
| STAT1      | 2.804882248           | APOL1      | 3.672189732           |
| CH25H      | 2.799824636           | ETV7       | 3.639138229           |
| MX2        | 2.794462907           | KCNJ15     | 3.633657828           |
| DTX3L      | 2.777284737           | HLA-DOB    | 3.579509657           |
| IFNB1      | 2.755846069           | DHX58      | 3.51738449            |
| HERC6      | 2.7294792             | IFI27      | 3.490603706           |
| SLC15A3    | 2.70493507            | STAT1      | 3.48421462            |
| PARP9      | 2.65177229            | PLSCR1     | 3.425689989           |
| DHX58      | 2.605990884           | GBP5       | 3.397782015           |
| DDX60      | 2.602487057           | IRF9       | 3.357768087           |
| ZFAT-AS1   | 2.597852965           | DDX60L     | 3.357203896           |
| IRF9       | 2.59356195            | MX2        | 3.356232774           |
| HERC5      | 2.58338294            | DDX60      | 3.343639004           |
| SP100      | 2.578462728           | DDX58      | 3.319701461           |
| NMI        | 2.566705041           | HERC6      | 3.316546043           |
| KCNJ15     | 2.539346778           | HERC5      | 3.315617755           |
| HELZ2      | 2.535506379           | RUFY4      | 3.311808007           |
| LINC01498  | 2.533504566           | IFITM1     | 3.257276443           |
| C5orf56    | 2.528659148           | PSMB8-AS1  | 3.227617874           |

Upregulated transcripts ( $p < 0.005$ ) upon ZIKV infection. Gene expression changes are expressed as  $\log_2$  (fold change). dpi, days post infection. Genes upregulated and related to immune response and function at both 3 and 5 dpi are highlighted in yellow and orange. Orange genes are further implicated in anti-viral activities.

**Table S3 (related to Figure 6). Top 50 Downregulated Transcripts upon ZIKV infection at 3 and 5 dpi**

| Transcript   | 3 dpi Z vs Control | Transcript   | 5 dpi ZIKV vs Control |
|--------------|--------------------|--------------|-----------------------|
| HMGCS2       | -2.947360279       | LINC00920    | -3.137656504          |
| LOC100996255 | -2.92994189        | BFSP2        | -2.797856937          |
| GBX1         | -2.701140164       | SLC22A6      | -2.764903145          |
| LOC101929371 | -2.64137911        | HEPACAM      | -2.697454936          |
| CLCNKB       | -2.56514082        | LINC01212    | -2.586317051          |
| HOTAIR       | -2.533631619       | MYF6         | -2.561210489          |
| LOC100652999 | -2.507660192       | PAX8-AS1     | -2.55927715           |
| HOXC10       | -2.457727936       | PGR          | -2.503568569          |
| SLC28A3      | -2.446843068       | HABP2        | -2.491847251          |
| LINC01160    | -2.439193152       | NAT8B        | -2.42594284           |
| ALDH1L1-AS1  | -2.434942587       | IQCJ         | -2.415030183          |
| MZB1         | -2.305799317       | SNORA35      | -2.351284677          |
| PRRX2        | -2.289480201       | LOC102724050 | -2.241734813          |
| SLC22A6      | -2.284554125       | DKFZP434L187 | -2.183969025          |
| MIR23A       | -2.283722461       | MIR1298      | -2.124655733          |
| ZNF541       | -2.283083756       | PRKACG       | -2.07027174           |
| PCDHB1       | -2.282399168       | HOXC10       | -2.052923768          |
| PHYHD1       | -2.261108299       | RFX8         | -2.006558464          |
| MIR219A2     | -2.255361976       | C2orf91      | -1.94123325           |
| LINGO4       | -2.255361976       | LINC00934    | -1.93686752           |
| CFTR         | -2.050334748       | LINC00605    | -1.922749767          |
| EMR2         | -2.040911245       | LOC100507537 | -1.877579774          |
| HABP2        | -2.023870876       | HIST1H2BH    | -1.868946039          |
| SNORD115-10  | -2.016944151       | DUSP27       | -1.69615308           |
| SLC39A12     | -1.970748618       | HDC          | -1.672321696          |
| LOC102546229 | -1.912540937       | SNORD77      | -1.584689192          |
| LOC100288814 | -1.8858107         | CFAP44-AS1   | -1.498273916          |
| SLC38A11     | -1.862570399       | HIST1H3E     | -1.466387422          |
| SLC17A8      | -1.847430172       | GPR151       | -1.336329005          |
| NRN1L        | -1.808372176       | SLC17A8      | -1.332902614          |
| PRND         | -1.79930009        | PRND         | -1.327989445          |
| TTLL6        | -1.785026198       | TTLL6        | -1.298819177          |
| MIR4677      | -1.785026198       | ALDH1A3      | -1.294508635          |
| HRH4         | -1.681812367       | GUCY2F       | -1.249219419          |
| ATP13A4-AS1  | -1.677103063       | CFTR         | -1.223088217          |
| PEG3         | -1.671028719       | LOC100652999 | -1.216625019          |
| NPPB         | -1.644969496       | SLC39A12     | -1.167204083          |
| IGFL3        | -1.571331344       | BLNK         | -1.147632076          |
| IL5RA        | -1.568894753       | RXFP3        | -1.048754355          |
| INTS4P2      | -1.535470259       | NMU          | -1.032510439          |
| GPR1         | -1.516290525       | GPR1         | -0.985267905          |
| LOC253573    | -1.514197676       | C1orf168     | -0.959538796          |
| HDC          | -1.482224243       | NDNF         | -0.926174556          |
| WFIKKN2      | -1.457536479       | PLS3         | -0.913887422          |
| C1orf110     | -1.428698074       | NKAPP1       | -0.911018957          |
| C2orf91      | -1.428581203       | LINC01470    | -0.901738232          |
| GUCY2F       | -1.387882336       | WNT8B        | -0.880326435          |
| HOXC-AS2     | -2.947360279       | RSPO1        | -0.876116464          |
| MEIS1-AS3    | -2.92994189        | GPC3         | -0.83652628           |
| PLA1A        | -2.701140164       | BTBD11       | -0.814469345          |

Downregulated transcripts ( $p < 0.005$ ) upon ZIKV infection. Gene expression changes are expressed as  $\log_2$  (fold change). dpi, days post infection.



**Table S4 (related to Figure 4). Electrophysiological properties of neurons in cortical organoids and *in vivo* fetal tissue**

| <b>Table S4: Cortical organoid neurons electrophysiology Figure 4D</b>                  |         |         |           |          |                   |         |              |
|-----------------------------------------------------------------------------------------|---------|---------|-----------|----------|-------------------|---------|--------------|
|                                                                                         | APs?    | Average | SEM       | n        | Statistical test* | p-value | Significance |
| Membrane Potential (mV)                                                                 | APs     | -60.2   | 2.2       | 12 cells | Unpaired          | 0.4479  | n.s.         |
|                                                                                         | No APs  | -57.1   | 3.4       | 12 cells |                   |         |              |
| Membrane Resistance ( $\Omega$ G)                                                       | APs     | 2.94    | 0.58      | 12 cells | Mann-Whitney      | 0.8603  | n.s.         |
|                                                                                         | No APs  | 2.81    | 0.44      | 12 cells |                   |         |              |
| Capacitance (pF)                                                                        | APs     | 14.4    | 3.6       | 12 cells | Mann-Whitney      | 0.2189  | n.s.         |
|                                                                                         | No APs  | 8.3     | 1.0       | 12 cells |                   |         |              |
| Current at -25mV (peak Na <sup>+</sup> current pA)                                      | APs     | -1.01   | 0.32      | 12 cells | Mann-Whitney      | <0.0001 | ****         |
|                                                                                         | No APs  | 0.21    | 0.04      | 12 cells |                   |         |              |
| Current at 45mV (peak K <sup>+</sup> current pA)                                        | APs     | 1.32    | 0.21      | 12 cells | Mann-Whitney      | 0.0029  | **           |
|                                                                                         | No APs  | 0.74    | 0.14      | 12 cells |                   |         |              |
| <b>Midgestational neurons (GW16-22) in CP of human fetal cortex (Moore et al. 2009)</b> |         |         |           |          |                   |         |              |
|                                                                                         | Average | SEM     | n         |          |                   |         |              |
| Membrane Potential (mV)                                                                 | -49.8   | 1.3     | 161 cells |          |                   |         |              |
| Membrane Resistance ( $\Omega$ G)                                                       | 3.05    | 0.18    | 161 cells |          |                   |         |              |
| Capacitance (pF)                                                                        | 15.6    | 0.88    | 161 cells |          |                   |         |              |
| Current at -25mV (peak Na <sup>+</sup> current pA)                                      | -0.42   | 0.05    | 161 cells |          |                   |         |              |
| Current at 45mV (peak K <sup>+</sup> current pA)                                        | 0.38    | 0.03    | 161 cells |          |                   |         |              |

APs = action potentials. Statistical tests: Two-tailed unpaired t-test “unpaired”, Two-tailed unpaired t-test with Welch’s correction “Welch”, and Mann-Whitney U Test “Mann-Whitney”. n.s. = not significant p-value >0.05.

**Table S5 (related to Figures 7 and S9). Statistics and p-values for Figures 7 and S9**

|                                         |                  | Average ± SEM     | n            | Statistical test* | p-value | Significance |
|-----------------------------------------|------------------|-------------------|--------------|-------------------|---------|--------------|
| <b>Figure 7A: 25HC 7 dpi</b>            |                  |                   |              |                   |         |              |
| RT-qPCR                                 | 0 μM + ZIKV      | 1.022 ± 0.09476   | 6 replicates | Unpaired          | <0.0001 | ****         |
|                                         | 2.5 μM + ZIKV    | 0.2657 ± 0.0732   |              |                   |         |              |
| Flavivirus %                            | 0 μM + ZIKV      | 62.41 ± 2.21      | 6 images     | Unpaired          | <0.0001 | ****         |
|                                         | 2.5 μM + ZIKV    | 17.46 ± 2.12      | 6 images     |                   |         |              |
| clCASP3 %                               | 0 μM Mock        | 7.38 ± 1.00       | 6 images     | Unpaired          | 0.0016  | **           |
|                                         | 2.5 μM Mock      | 13.48 ± 1.01      | 6 images     |                   |         |              |
|                                         | 0 μM + ZIKV      | 24.34 ± 1.77      | 6 images     | Unpaired          | 0.6506  | n.s.         |
|                                         | 2.5 μM + ZIKV    | 23.12 ± 1.94      | 6 images     |                   |         |              |
| <b>Figure 7B: R428 7 dpi</b>            |                  |                   |              |                   |         |              |
| RT-qPCR                                 | 0 nM + ZIKV      | 1.012 ± 0.07623   | 5 replicates | Unpaired          | 0.3679  | n.s.         |
|                                         | 30 nM + ZIKV     | 0.8858 ± 0.1075   |              |                   |         |              |
|                                         | 300 nM + ZIKV    | 0.9392 ± 0.07019  |              |                   |         |              |
|                                         | 1 μM + ZIKV      | 0.5974 ± 0.1405   |              |                   |         |              |
| Flavivirus %                            | 0 nM + ZIKV      | 35.21 ± 6.35      | 7 images     | Unpaired          | 0.0642  | n.s.         |
|                                         | 1 μM + ZIKV      | 19.81 ± 4.10      | 7 images     |                   |         |              |
| clCASP3 %                               | 0 nM Mock        | 6.59 ± 1.79       | 4 images     | Unpaired          | 0.7975  | n.s.         |
|                                         | 1 μM Mock        | 7.18 ± 0.95       | 5 images     |                   |         |              |
|                                         | 0 nM + ZIKV      | 21.03 ± 3.19      | 7 images     | Welch             | 0.0200  | *            |
|                                         | 1 μM + ZIKV      | 11.07 ± 0.97      | 7 images     |                   |         |              |
| <b>Figure 7C: Duramycin 7 dpi</b>       |                  |                   |              |                   |         |              |
| RT-qPCR                                 | 0 μM + ZIKV      | 1.014 ± 0.1163    | 3 replicates | Unpaired          | 0.7510  | n.s.         |
|                                         | 0.1 μM + ZIKV    | 0.9704 ± 0.05768  |              |                   |         |              |
|                                         | 0.5 μM + ZIKV    | 0.1456 ± 0.04917  |              |                   |         |              |
|                                         | 1 μM + ZIKV      | 0.1859 ± 0.09298  |              |                   |         |              |
| Flavivirus %                            | 0 μM + ZIKV      | 51.51 ± 6.10      | 7 images     | Welch             | 0.0002  | ***          |
|                                         | 1 μM + ZIKV      | 0.96 ± 0.52       | 8 images     |                   |         |              |
| clCASP3 %                               | 0 μM Mock        | 7.47 ± 1.83       | 2 images     | Welch             | 0.6854  | n.s.         |
|                                         | 1 μM Mock        | 6.29 ± 1.99       | 7 images     |                   |         |              |
|                                         | 0 μM + ZIKV      | 27.06 ± 4.95      | 8 images     | Welch             | 0.0030  | **           |
|                                         | 1 μM + ZIKV      | 5.11 ± 0.51       | 8 images     |                   |         |              |
| <b>Figure 7D: Ivermectin 7 dpi</b>      |                  |                   |              |                   |         |              |
| RT-qPCR                                 | 0 nM + ZIKV      | 1.013 ± 0.101     | 4 replicates | Unpaired          | <0.0001 | ****         |
|                                         | 500 nM + ZIKV    | 0.04256 ± 0.02448 |              |                   |         |              |
| Flavivirus %                            | 0 nM + ZIKV      | 85.18 ± 4.12      | 8 images     | Welch             | <0.0001 | ****         |
|                                         | 500 nM + ZIKV    | 2.22 ± 0.64       | 8 images     |                   |         |              |
| clCASP3 %                               | 0 nM Mock        | 4.98 ± 0.69       | 9 images     | Unpaired          | 0.0216  | *            |
|                                         | 500 nM Mock      | 8.66 ± 1.31       | 8 images     |                   |         |              |
|                                         | 0 nM + ZIKV      | 16.80 ± 2.21      | 8 images     | Welch             | 0.0086  | **           |
|                                         | 500 nM + ZIKV    | 8.88 ± 0.96       | 8 images     |                   |         |              |
| <b>Figure S7 A': 25HC 3 dpi</b>         |                  |                   |              |                   |         |              |
| RT-qPCR                                 | 0 μM + ZIKV      | 1.027 ± 0.1359    | 4 replicates | Unpaired          | 0.0029  | **           |
|                                         | 2.5 μM + ZIKV    | 0.2678 ± 0.07895  |              |                   |         |              |
| <b>Figure S7 B': AXL-antibody 3 dpi</b> |                  |                   |              |                   |         |              |
| RT-qPCR                                 | 0 μg/mL + ZIKV   | 1.003 ± 0.04615   | 4 replicates | Unpaired          | 0.3045  | n.s.         |
|                                         | 100 μg/mL + ZIKV | 1.216 ± 0.1843    |              |                   |         |              |
| <b>Figure S7 C': Azithromycin 3 dpi</b> |                  |                   |              |                   |         |              |
| RT-qPCR                                 | 0 μM + ZIKV      | 1.041 ± 0.161     | 4 replicates | Unpaired          | 0.6261  | n.s.         |
|                                         | 5 μM + ZIKV      | 1.161 ± 0.1685    |              |                   |         |              |
|                                         | 10 μM + ZIKV     | 1.028 ± 0.1602    |              |                   |         |              |
|                                         | 20 μM + ZIKV     | 0.8231 ± 0.1228   |              |                   |         |              |
|                                         | 40 μM + ZIKV     | 0.792 ± 0.08743   |              |                   |         |              |
| <b>Figure S7 D' Duramycin 3 dpi</b>     |                  |                   |              |                   |         |              |
| RT-qPCR                                 | 0 μM + ZIKV      | 1.1 ± 0.2063      | 6 replicates | Unpaired          | 0.2350  | n.s.         |
|                                         | 0.1 μM + ZIKV    | 0.8027 ± 0.1123   |              |                   |         |              |
|                                         | 0.5 μM + ZIKV    | 0.1842 ± 0.0798   |              |                   |         |              |
|                                         | 1 μM + ZIKV      | 0.03577 ± 0.01984 |              |                   |         |              |

dpi= days post infection with Zika virus (ZIKV). Statistical tests: Two-tailed unpaired t-test “unpaired”, Two-tailed unpaired t-test with Welch’s correction “Welch”, and Mann-Whitney U Test “Mann-Whitney”. n.s. = not significant p-value >0.05.

**Table S6. Key Resources**

| REAGENT or RESOURCE                                       | SOURCE                                                                    | IDENTIFIER      |
|-----------------------------------------------------------|---------------------------------------------------------------------------|-----------------|
| <u>Antibodies</u>                                         |                                                                           |                 |
| See Table S7 for list of Antibodies                       | N/A                                                                       | N/A             |
| <u>Biological Samples</u>                                 |                                                                           |                 |
| Human fetal brain GW 14-17                                | Novogenix Laboratories                                                    | N/A             |
| Human fetal tissue GW 4                                   | University of Tübingen                                                    | N/A             |
| <u>Chemicals, Peptides, and Recombinant Proteins</u>      |                                                                           |                 |
| ESGRO Mouse Recombinant Leukemia Inhibitory Factor (mLIF) | EMD Millipore                                                             | ESG1106         |
| InSolution Smoothened Agonist (SAG)                       | EMD Millipore                                                             | 566661          |
| 25-Hydroxycholesterol (25HC)                              | Sigma-Aldrich                                                             | H1015           |
| Duramycin                                                 | Molecular Targeting Technologies, Inc.                                    | D-1005          |
| Ivermectin                                                | Sigma-Aldrich                                                             | I8898           |
| Azithromycin                                              | Sigma-Aldrich                                                             | PZ0007          |
| R428                                                      | MedChem Express                                                           | HY-15150        |
| Human AXL-antibody                                        | R&D Systems                                                               | AF154           |
| Normal Goat IgG Control                                   | R&D Systems                                                               | AB-108-C        |
| <u>Critical Commercial Assays</u>                         |                                                                           |                 |
| miRNeasy Mini Kit                                         | Qiagen                                                                    | 217044          |
| RNeasy Mini Kit                                           | Qiagen                                                                    | 74106           |
| SuperScript IV First-Strand Synthesis System              | Thermo Fisher Scientific                                                  | 18091200        |
| <u>Deposited Data</u>                                     |                                                                           |                 |
| Microarray data                                           | Gene Expression Omnibus (NCBI)                                            | GSE97872        |
| RNA-seq data                                              | Gene Expression Omnibus (NCBI)                                            | GSE97919        |
| <u>Experimental Models: Cell Lines</u>                    |                                                                           |                 |
| H9 human embryonic stem cells                             | WiCell Research Institute (Thomson et al., 1998)                          | NIH 0062        |
| UCLA1 human embryonic stem cells                          | UCLA Stem Cell Core at Broad Stem Cell Center (Diaz Perez et al., 2012)   | NIH 0058        |
| hiPS2 human induced pluripotent stem cells                | UCLA Stem Cell Core at Broad Stem Cell Center (Lowry et al., 2008)        | N/A             |
| XFiPS Xeno-free human induced pluripotent stem cells      | UCLA Stem Cell Core at Broad Stem Cell Center (Karumbayaram et al., 2012) | N/A             |
| <i>Aedes albopictus</i> : C6/36 clone                     | ATCC CRL-1660                                                             | N/A             |
| <u>Experimental Models: Organisms/Strains</u>             |                                                                           |                 |
| Zika virus                                                | Center for Disease Control and Prevention of United States (CDC)          | Strain PRVABC59 |
| AAV1.Syn.GCaM6f.WPRE.SV40                                 | University of Pennsylvania Vector CORE                                    | AV-1-PV2822     |

|                                                     |                                                        |                                                                                                                                    |
|-----------------------------------------------------|--------------------------------------------------------|------------------------------------------------------------------------------------------------------------------------------------|
| <u>Recombinant DNA</u>                              |                                                        |                                                                                                                                    |
| pLenti-Synapsin-hChr2(H134R)-EYFP-WPRE              | Addgene                                                | 20945                                                                                                                              |
| <u>Software and Algorithms</u>                      |                                                        |                                                                                                                                    |
| Adobe Photoshop CS5, CS6                            | Adobe Systems Inc.                                     | <a href="https://www.adobe.com">https://www.adobe.com</a>                                                                          |
| Image J                                             | National Institutes of Health (Schneider et al., 2012) | <a href="https://imagej.nih.gov/ij/">https://imagej.nih.gov/ij/</a>                                                                |
| GraphPad InStat                                     | GraphPad Software                                      | <a href="http://www.graphpad.com/scientific-software/instat/">www.graphpad.com/scientific-software/instat/</a>                     |
| GraphPad Prism 7                                    | GraphPad Software                                      | <a href="http://www.graphpad.com/scientific-software/prism/">www.graphpad.com/scientific-software/prism/</a>                       |
| CoNTEXT                                             | (Stein et al., 2014)                                   | <a href="https://context.semel.ucla.edu">https://context.semel.ucla.edu</a>                                                        |
| STAR                                                | (Dobin et al., 2013)                                   | <a href="https://code.google.com/archive/p/rna-star/">https://code.google.com/archive/p/rna-star/</a>                              |
| Limma-Voom                                          | (Law et al., 2014)                                     | <a href="http://www.bioconductor.org">www.bioconductor.org</a>                                                                     |
| EdgeR                                               | (Robinson et al., 2010)                                | <a href="https://bioconductor.org">https://bioconductor.org</a>                                                                    |
| HTSeq                                               |                                                        | <a href="http://www.huber.embl.de/users/anders/HTSeq/doc/overview.html">www.huber.embl.de/users/anders/HTSeq/doc/overview.html</a> |
| Metascape                                           |                                                        | <a href="http://metascape.org">http://metascape.org</a>                                                                            |
| <u>Other</u>                                        |                                                        |                                                                                                                                    |
| Statistical tests and p-values: See Table S4 and S5 | This Study                                             | N/A                                                                                                                                |



**Table S7. Primary Antibody List**

| Name               | Species    | Dilution | Vendor              | Catalog #   | Identifier       |
|--------------------|------------|----------|---------------------|-------------|------------------|
| APKC (PKC zeta)    | Rabbit     | 1:100    | Santa Cruz Biotech  | sc-216      | RRID:AB_2300359  |
| AQP1               | Rabbit     | 1:500    | EMD Millipore       | ab2219      | RRID:AB_1163380  |
| AXL                | Rabbit     | 1:100    | Cell Signaling Tech | 8661S       | RRID:AB_11217435 |
| BRN2 (POU3F2)      | Goat       | 1:4000   | Santa Cruz Biotech  | sc-6029     | RRID:AB_2167385  |
| CALRETININ         | Rabbit     | 1:2000   | EMD Millipore       | AB5054      | RRID:AB_2068506  |
| CAMKII alpha       | Mouse      | 1:200    | EMD Millipore       | MAB3119     | n/a              |
| CASP-3 (activated) | Rabbit     | 1:500    | Cell Signaling Tech | 9661S       | RRID:AB_2341188  |
| CD209              | Mouse      | 1:50     | BioLegend           | 330103      | RRID:AB_1134057  |
| COUP-TF1 (NR2F1)   | Mouse      | 1:1000   | Perseus Proteomics  | PP-H8132    | RRID:AB_2155494  |
| CTIP2 (BCL11B)     | Rat        | 1:1000   | Abcam               | ab18465     | RRID:AB_2064130  |
| CUX1 (CDP) (B-10)  | Mouse      | 1:100    | Santa Cruz Biotech  | sc-514008   | RRID:AB_2715519  |
| FLAVIVIRUS         | Mouse      | 1:1000   | EMD Millipore       | MAB10216    | RRID:AB_827205   |
| FOXG1              | Rabbit     | 1:1000   | Abcam               | ab18259     | RRID:AB_732415   |
| GABA               | Rabbit     | 1:10000  | Sigma-Aldrich       | A2052       | RRID:AB_477652   |
| GAD65              | Mouse      | 1:200    | BD Biosciences      | 559931      | RRID:AB_397380   |
| GFAP               | Rabbit     | 1:500    | Abcam               | ab7260-50   | RRID:AB_305808   |
| GFP                | Sheep      | 1:800    | ABD Serotec         | 4745-1051   | RRID:AB_619712   |
| GFP                | Chicken    | 1:1000   | Aves Lab Inc        | GFP-1020    | RRID:AB_10000240 |
| GFP                | Rabbit     | 1:4000   | Invitrogen          | A6455       | RRID:AB_221570   |
| HepaCAM            | Mouse      | 1:500    | R&D Systems         | MAB4108     | RRID:AB_2117687  |
| HOPX               | Rabbit     | 1:1000   | Sigma-Aldrich       | HPA030180   | RRID:AB_10603770 |
| ISL1               | Goat       | 1:8000   | R&D Systems         | AF1837      | RRID:AB_2126324  |
| ITGβ5              | Sheep      | 1:200    | R&D Systems         | AF3824      | RRID:AB_1151977  |
| LAMININ            | Rabbit     | 1:1000   | Abcam               | ab30320     | RRID:AB_775970   |
| LHX2 (C-20)        | Goat       | 1:1000   | Santa Cruz Biotech  | sc-19344    | RRID:AB_2135660  |
| MER (MERTK)        | Mouse      | 1:50     | R&D Systems         | FAB8912P    | RRID:AB_357214   |
| N-CADHERIN         | Mouse      | 1:1000   | BD Biosciences      | 610920      | RRID:AB_2077527  |
| NESTIN             | Mouse      | 1:1000   | Neuromics           | MO15012     | RRID:AB_2148919  |
| NEUROPEPTIDE Y     | Rabbit     | 1:800    | Abcam               | ab10980     | RRID:AB_297635   |
| NKX2-1             | Mouse      | 1:500    | Novocastra          | NCL-L-TTR-1 | RRID:AB_564042   |
| OLIG2 (252)        | Guinea Pig | 1:20000  | Novitch lab (UCLA)  | n/a         | RRID:AB_2715520  |
| OLIG2              | Rabbit     | 1:5000   | EMD Millipore       | AB9610      | RRID:AB_570666   |
| PARVALBUMIN        | Rabbit     | 1:5000   | Abcam               | AB11427-50  | RRID:AB_298032   |
| PAX6               | Mouse      | 1:100    | DSHB                | Supernatant | RRID:AB_528427   |
| PAX6               | Rabbit     | 1:1000   | MBL International   | PD022       | RRID:AB_1520876  |
| pVIMENTIN          | Mouse      | 1:500    | MBL International   | D076-3      | RRID:AB_592963   |
| pSTAT3 (Try705)    | Rabbit     | 1:100    | Cell Signaling Tech | 9145P       | RRID:AB_2491009  |
| SATB2              | Mouse      | 1:100    | Abcam               | ab51502     | RRID:AB_882455   |
| SOX2               | Goat       | 1:100    | Santa Cruz Biotech. | sc-17320    | RRID:AB_2286684  |
| SP8 (C18)          | Goat       | 1:100    | Santa Cruz Biotech. | sc-104661   | RRID:AB_2194626  |
| SOMATOSTATIN       | Rat        | 1:100    | EMD Millipore       | MAB354      | RRID:AB_2255365  |
| TBR1               | Rabbit     | 1:2000   | Abcam               | ab 31940    | RRID:AB_2200219  |
| TBR2 (EOMES)       | Chicken    | 1:1000   | EMD Millipore       | ab15894     | RRID:AB_10615604 |
| TIM1 (HAVCR1)      | Goat       | 1:100    | R&D Systems         | AF1750      | RRID:AB_2116561  |
| TYRO3              | Mouse      | 1:50     | R&D Systems         | FAB859P     | RRID:AB_2210976  |
| TYRO3              | Goat       | 1:100    | R&D Systems         | AF859-SP    | RRID:AB_355666   |
| VGLUT1 (SLC17A7)   | Guinea Pig | 1:1000   | EMD Millipore       | ab5905      | RRID:AB_2301751  |

DHSB, Developmental Studies Hybridoma Bank; RRID, Research Resource Identifiers (<http://antibodyregistry.org/>)

## SUPPLEMENTAL EXPERIMENTAL PROCEDURES

### *Alternative organoid differentiation methods*

The differentiation of basal ganglionic eminence (GE) organoids was based upon the methods used for cortical organoid differentiation. From day 15-21, smoothed agonist (SAG, Millipore) was added to the media to activate sonic hedgehog signaling (200 nM for the lateral ganglionic eminence organoid; 1  $\mu$ M for the medial or caudal ganglionic eminence).

Cerebral organoids produced using the Lancaster method in Figure S2 were cultured as described (Lancaster et al., 2013; Lancaster and Knoblich, 2014). Briefly, H9 hESCs cultured on irradiated mouse embryonic fibroblasts were lifted using Dispase and then dissociated to single cells by trypsinization. Cells were plated to Corning low-attachment U-bottomed 96-well plates at 9,000 cells per well in low-bFGF media with Rock inhibitor. Aggregates were fed every other day. On day 6, aggregates were transferred to Corning low-attachment 24-well plates in neural induction media. On day 11, the aggregates were embedded in Matrigel (BD Biosciences) and then grown in differentiation media. After 4 days, Matrigel-coated aggregates were transferred to spinning bioreactors and B27 without Vitamin A was replaced with B27 with Vitamin A and the media was changed weekly.

### *ZIKV Drug Testing*

For CH25H experiments, organoids were pre-treated with 0.1-2.5  $\mu$ M of CH25H for 12-15 hours, before infection with ZIKV. 2 hours after inoculation, CH25H was added and maintained at 0.1-2.5  $\mu$ M throughout the experiments. For AXL blocking antibody (100  $\mu$ g/ml), Duramycin (0.1-1  $\mu$ M), Azithromycin (5-40  $\mu$ M), and Ivermectin (0.5  $\mu$ M) experiments, organoids were pretreated with these compounds for 3 hours prior to ZIKV inoculation, and maintained at described concentrations throughout the experiments. For R428 (30 nM-1  $\mu$ M), organoids were pretreated for 24 hours, and maintained with the indicated concentration throughout the experiments. For two-dimensional cortical cultures, W6 cerebral organoids were dissociated and plated at 400,000 cells/well in a 24-well plate a day prior to ZIKV infection. Spinal cord progenitors around D21 were differentiated as described. Both neural progenitors were inoculated with viral supernatant and incubated for 2 hours (MOI = 0.8 to 1) before dilution to 1:2 with fresh media. After 24 hours, media was exchanged and cell cultures analyzed at various time points.

### *Human fetal tissue*

Experiments were performed with prior approval from the research ethics committees at the UCLA Office of the Human Research Protection Program and the University of Tübingen (institutional review board [IRB] #323/2017BO2) and Novogenix Laboratories. Embryonic tissues were obtained with informed consent as discarded materials resulting from elective, legal terminations. Samples were de-identified in accordance with institutional guidelines. Specimen ages for this study are denoted as gestational weeks, as determined by the date of the last menstrual period or ultrasound, and confirmed by analysis of developmental characteristics. Samples were processed as described below.

### *Tissue Processing and Immunohistochemistry*

Organoids were fixed in 4% Paraformaldehyde (PFA) in Phosphate Buffered Saline (PBS) for 20 minutes on ice and then washed twice in PBS. Organoids were then incubated in 30% sucrose in PBS for 1-3 hours on ice until completely submersed, embedded, and frozen in Tissue-Tek Optimal Cutting Temperature (O.C.T., Sakura), cryosectioned at 12  $\mu$ m thickness, and collected onto Superfrost Plus slides (Fisher Scientific). GW14-17 human fetal brain tissue was fixed in 4% PFA in PBS for 3-4 days at 4  $^{\circ}$ C, washed twice in PBS, and immersed in 30% sucrose in PBS overnight at 4  $^{\circ}$ C. The tissue was then frozen in O.C.T. and cryosectioned at 20  $\mu$ m thickness. Paraffin embedded GW4 human fetal specimens were prepared at the University of Tübingen, microtome sectioned at by the UCLA Pathology Core, and microtome sectioned at 10  $\mu$ m thickness by the UCLA Pathology Core. The paraffin embedded tissue was dehydrated and processed for antigen retrieval.

For adherent neural progenitors, cells were fixed in 4% PFA in PBS for 10 minutes on ice and washed twice in PBS. Cells were then permeabilized with PBST for 5 minutes at RT, blocked with 1% HHS and 0.1% Triton X-100 in PBS for 10 minutes at RT, and incubated with primary antibodies diluted in the blocking solution overnight at 4  $^{\circ}$ C. Cells were then washed with blocking solution three times for 5 minutes each, and incubated with secondary antibodies and Hoechst 33258 diluted in the blocking solution for 1 hour at RT. After three washes with the blocking solution, cells were mounted in ProLong Diamond Antifade Mountant and imaged using a confocal microscope.

### ***Microscopic imaging***

Confocal images were acquired using Zeiss LSM 700, LSM 780, or Zeiss LSM 800 confocal microscopes equipped with a motorized stage and Zen black or blue software. Tiled images were assembled using the Zen Tiles and Positions module. For brightfield imaging, an EVOS microscope (Advanced Microscopy Group) was used. All images were compiled in Adobe Photoshop, with image adjustments applied to the entire image and restricted to brightness, contrast, and levels. Images shown in figures as comparisons were obtained and processed in parallel using identical settings.

### ***Calcium Imaging***

For two-photon calcium imaging experiments, AAV1-Synapsin::GCaMP6f adenoviruses (AV-1-PV2822) were obtained from the University of Pennsylvania Vector Core (<https://www.med.upenn.edu/gtp/vectorcore/>). Organoids were inoculated with 1:50 diluted viral stocks overnight and replaced with fresh media after 12-17 hours. After 7-14 days, organoids were mounted in collagen or Matrigel without phenol red in N2B27 media containing BrainPhys Neuronal Media (Stem Cell Technologies) as the base media instead of DMEM/F12.

Calcium imaging was performed using a resonant scanning two-photon microscope (Scientifica) equipped with a Ti:sapphire excitation laser (Coherent, Ultra 2), operated at 920 nm. Images with approximately 500  $\mu\text{m}$  x 500  $\mu\text{m}$  field-of-view were acquired at a frame rate of 30.9 Hz using a 20x 0.8 NA objective. Raw calcium imaging movies were processed in MATLAB using custom-written analysis scripts. Motion corrections of small horizontal drifts were performed with a recursive image registration algorithm. The same algorithm was used to align and concatenate videos of two consecutive recording sessions. Active neurons were detected with an automated segmentation algorithm (Cai et al., 2016) which (i) detected 'bright pixels' of local fluorescence maxima meeting minimum fluorescence criteria and (ii) used an iterative process to group together neighboring pixels based on the correlation of each bright pixel's fluorescence time trace ( $\pm 20\text{s}$  window around local maxima of fluorescence event) with the mean time trace of the pixels group in the previous iterative step. Pixels with correlation  $> 0.35$  were added to the group, and the process was repeated until the total number of pixels in the group no longer changed. Cells whose centroids were within 2  $\mu\text{m}$  of each other or whose pixels overlapped by at least 70%, were merged together. Segments with eccentricity  $> 98\%$  were discarded to avoid elongated dendritic and axonal structures.  $\Delta F/F$  traces were calculated for each segment by computing the average fluorescence value  $F(t)$  over all pixels at each time point, and then subtracting the cell's mode value over the whole video and dividing by the same number. Traces were low pass-filtered using a 10-th order Butterworth filter with 5Hz cutoff frequency. Finally, all detected segments and  $\Delta F/F$  traces were examined visually, and only segments corresponding to neuronal somas with clear fluorescence peaks, were analyzed further. Putative spikes were extracted by deconvolving the  $\Delta F/F$  traces with a 2 s single-exponential kernel (Yaksi and Friedrich, 2006) and applying a spike detection threshold of 2.5x standard deviation of the deconvolved trace. Spike rates were computed for each cell, over 0.33 sec-long bins, overlapping by 50%.

Pearson's Correlation coefficients were computed between all pairs of firing rates vectors. To detect significantly correlated cell pairs, we circularly shifted the firing rate vector of each cell by a random lag (up to half the movie duration), while keeping that of the second cell unaltered, and computed the new correlation between the two traces. This was repeated 1000 times for each of the two cells in a pair, yielding a distribution of 2000 'shifted-correlation' values. A cell pair was significantly correlated if its default correlation exceeded the 95th percentile of the shifted-correlation distribution.

### ***Electrophysiology***

Organoids were embedded in 4% low gelling agarose (Sigma) cooled to 47 °C and sliced in artificial cerebrospinal fluid (aCSF) containing 125 mM NaCl, 2.5m M KCl, 1 mM  $\text{MgCl}_2 \cdot 6\text{H}_2\text{O}$ , 2 mM  $\text{CaCl}_2 \cdot 2\text{H}_2\text{O}$ , 1.25 mM  $\text{NaH}_2\text{PO}_4 \cdot \text{H}_2\text{O}$ , 25 mM  $\text{NaHCO}_3$ , and 0.45% glucose using a vibratome (Leica VT1000S) at 200-250  $\mu\text{m}$  thickness. aCSF was oxygenated (95%  $\text{O}_2$ /5%  $\text{CO}_2$ ) to pH of 7.4 and cooled on ice during the slice preparation. Slices were cultured on Millicell membrane (Millicell Cell Culture Insert, 0.4  $\mu\text{m}$ , 30 mm diameter, ref# PICM0RG50, Millipore) in N2B27 media at 40%  $\text{O}_2$  for up to one week before recording.

Cells were visualized with infrared optics on an upright microscope (BX51WI, Olympus). pCLAMP10 software and a MultiClamp 700B amplifier was used for electrophysiology (Axon Instruments). The aCSF contained the following: 124 mM NaCl, 4.5 mM KCl, 2 mM  $\text{CaCl}_2$ , 1 mM  $\text{MgCl}_2$ , 26 mM  $\text{NaHCO}_3$ , 1.2 mM  $\text{NaH}_2\text{PO}_4$ , and 10

mM D-glucose continuously bubbled with a mixture of 95% O<sub>2</sub>/5% CO<sub>2</sub>. The intracellular solution in the patch pipette comprised the following: 135 mM potassium gluconate, 3 mM KCl, 0.1 mM CaCl<sub>2</sub>, 10 mM HEPES, 1 mM EGTA, 8 mM Na<sub>2</sub>-phosphocreatine, 4 mM Mg-ATP, 0.3 mM Na<sub>2</sub>-GTP; pH 7.3 adjusted with KOH. The patch-pipettes had 5–6 MΩ resistance when filled with intracellular solution. The tip potential of -15.6 mV was corrected in all the data that are shown. The data were analyzed with Clampfit10.2 (Molecular Devices). All statistical tests were run in GraphPad InStat 3. The graphs were created in GraphPad Prism and assembled in Adobe Illustrator. N numbers are defined as the numbers of cells defined in the figure legends.

### ***RNA Isolation, Processing, Microarray Hybridization, RNA-Sequencing, and Transcriptome Analyses***

Human cortical organoids were lysed in QIAzol reagents and RNA was extracted following manufacturer's instructions (miRNeasy Micro Kit, Qiagen). For CoNTEXT, TMAP, WGCNA, and GO ontology analyses (Figure 2), cerebral organoids derived from H9 were collected with 3 replicates (3 independent experiments, 12 samples total) at W5, W8, W11, and W14 and RNA samples were sent to the UCLA Neuroscience Genomics Core. RNA integrity was confirmed with the Agilent 2100 Bioanalyzer (RIN > 8) and samples were hybridized to the HumanHT 12v4.0. Expression data was analyzed as described in Stein et al., 2014 and are publicly available. For ZIKV analyses (Figure 6), W8 mock and ZIKV infected cerebral organoids 3 and 5 days post infection were collected with 3 replicates (6 samples total). RNA samples were sent to the UCLA Clinical Microarray Core (CMC) and RNA integrity was confirmed with the Agilent 2100 Bioanalyzer. The cDNA libraries were generated using the KAPA stranded mRNA-Seq kits (KAPA Biosystems) and sequenced using Illumina HiSeq 3000, yielding between 27 and 101 million reads per sample. Quality control was performed on base qualities and nucleotide composition of sequences. Alignment to the human genome (hg38) was performed using the STAR spliced read aligner (Dobin et al., 2013) with default parameters. Additional QC was performed after the alignment to examine: the level of mismatch rate, mapping rate to the whole genome, repeats, chromosomes, key transcriptomic regions (exons, introns, UTRs, genes), insert sizes, AT/GC dropout, transcript coverage and GC bias. One sample (a 3-day control sample) resulted an outlier and was excluded from further analysis. Between 84 and 89% (average 86%) of the reads mapped uniquely to the human genome. Total counts of read-fragments aligned to candidate gene regions were derived using HTSeq program ([www.huber.embl.de/users/anders/HTSeq/doc/overview.html](http://www.huber.embl.de/users/anders/HTSeq/doc/overview.html)) with *H. Sapiens* hg38 refSeq (refFlat table) as a reference and used as a basis for the quantification of gene expression. Only uniquely mapped reads were used for subsequent analyses. Differential expression analysis was conducted with R-project and the Bioconductor package Limma-voom (Law et al., 2014) Statistical significance of the differential expression was determined at false discovery rate (FDR) < 5%. Differentially regulated genes were assigned to relevant Gene Ontology groups using Metascape online software (<http://metascape.org>) (Tripathi et al., 2015).

### ***Quantitative PCR***

Reverse Transcriptase qPCR (RT-qPCR) was performed as described (Kong et al., 2015). In brief, total RNA was extracted with either an RNeasy Mini or miRNeasy Mini Kit (Qiagen). For each sample, >500 ng of total RNA was used for cDNA synthesis using the SuperScript IV First-Strand Synthesis System (Invitrogen). In each RT-qPCR reaction, cDNA was combined with LightCycler 480 SYBR Green I Master Mix (Roche) and the exon-spanning primer pairs listed below. All primer pairs were validated for ≥ 1.8 amplification efficiency as previously described (Watanabe et al., 2012). All samples were run using a Roche LightCycler 480 real-time PCR system in duplicates, and relative expression levels determined by normalizing the crossing points to the internal reference gene *ACTB* (β-Actin). Primers used are as follows: β-ACTIN (Amplicon size 200bp) fw 5'-CTGTGGCATCCACGAACTA-3' rv 5'-AGTACTTGCGCTCAGGAGGA-3'; FOXG1 (Amplicon size 191bp) fw 5'-CCAGACCAGTTACTTTTTCCC-3' rv 5'-TGAAATAATCAGACAGTCCCCC-3'; GAD65 (Amplicon size 140bp) fw 5'-TTTTGGTCTTTCGGGTCGGAA-3' rv 5'-TTCTCGGCGTCTCCGTAGAG-3'; GFAP (Amplicon size 209bp) fw 5'-CTGCGGCTCGATCAACTCA-3' rv 5'-TCCAGCGACTCAATCTTCCTC-3'; GSX2 (Amplicon size 106bp) fw 5'-ATGTCGCGCTCCTTCTATGTC-3' rv 5'-CAAGCGGGATGAAGAAATCCG-3'; NKX2.1 (Amplicon size 68bp) fw 5'-AGCACACGACTCCGTTCTC-3' rv 5'-GCCCACTTCTTGTAGCTTTCC-3'; OLIG2 (Amplicon size 90bp) fw 5'-ATAGATCGACGCGACACCAG-3' rv 5'-ACCCGAAAATCTGGATGCGA-3'; PV (Amplicon size 96bp) fw 5'-AAGAGTGC GGATGATGTGAAG-3' rv 5'-GCCTTTTAGGATGAATCCCAGC-3'; SST (Amplicon size 108bp) fw 5'-ACCCAACCAGACGGAGAATGA-3' rv 5'-GCCGGTTTGTAGTTAGCAGA-3'; ZIKV (Amplicon size 141bp) fw 5'-TTGTGGAAGGTATGTCAGGTG-3' rv 5'-ATCTTACCTCCGCATGTTG-3'



### ***Statistical analysis***

The normality and equality of variance of each data set was determined using GraphPad InStat or Prism software, and appropriate parametric (for normal distributions) or non-parametric (for uneven distributions) were accordingly applied as indicated in the figure legends. Paired and unpaired Student's two tailed *t* tests with or without Welch's correction (as appropriate) and two tailed Mann–Whitney tests were calculated using Prism software. Significance was assumed when  $p < 0.05$ . Throughout the manuscript, the results of statistical tests ( $p$  values and  $n$  numbers) are reported in the figure legends, Table S4-S5, and asterisks on the panels. Signifiers used are as follows: no significance (n.s.)  $p > 0.05$ , \*  $p \leq 0.05$ , \*\*  $p \leq 0.01$ , \*\*\*  $p \leq 0.001$ , \*\*\*\*  $p \leq 0.0001$ . All data are presented as mean  $\pm$  SEM unless otherwise specified in the figure legends.

### ***Immunohistochemistry Quantification***

All cell counts and measurements were compiled in Adobe Photoshop and ImageJ. For cerebral induction efficiency (Figure 1B), the percent of total cells double positive for FOXG1 and LHX2 were counted. To exclude the necrotic center of the aggregate, cICASP3<sup>+</sup> regions were excluded from the counts. For perimeter analysis in Figure 1C, the perimeters of 3 representative W2.5 organoids were measured across 9 independent experiments using ImageJ. For cell fate quantifications in Figure 1E and 1G, the average number of cells positive for PAX6, SOX2, TBR2, and CTIP2 per field was counted. In Figure S1G, the average percent of cerebral organoid cells positive for SOX2, TBR2, and TBR1 per field was counted. In Figure S1D and S1J, the thickness of the VZ, defined as the SOX2<sup>+</sup> dense region, SVZ, defined as the SOX2<sup>+</sup> sparse and TBR2<sup>+</sup> region, and CP, defined as the dense CTIP2<sup>+</sup> regions were measured. In figure S2B,  $n=8$  LAN and  $n=9$  B27 organoids were scored for the number of rosettes with PAX6<sup>+</sup> regions; the area and perimeter of the PAX6<sup>+</sup> region was measured using ImageJ.  $n=8$  LAN,  $n=9$  B27 organoids were scored. In Figure S3D, the percentage of NKX2.1 positive cells out of total cells per entire W5 organoid were counted. Necrotic cells in the center of the organoids were excluded from cell counts. In Figures 3D and S4B-S4C, quantification of cells per field was measured. Distinctions between VZ and SVZ for thickness measurements were defined as where PAX6 positive cells became less dense and where TBR2 positive cells accumulated. aRG cells were operationally defined as PAX6/pVIM positive cells dividing at the apical membrane; bRG cells were defined as PAX6/pVIM double positive cells dividing outside the VZ. In Figure S5A and S5C, the number of HepaCAM positive astrocytes was represented as the average number of cells positive for HepaCAM per field. In Figures 3H and S4E, the relative distribution of neurons per field of the cortical plate was counted. The apical edge of the CP was assigned a relative positional value of 0 and the basal edge assigned a positional value of 1.0. Median cell positions  $\pm$  95% confidence intervals are plotted. In Figure S6B, viral infection efficiency was quantified by scoring the total number of cells expressing GFP, adeno-associated virus AAV1-SYNAPSIN::GCaMP6f, and/or CTIP2. For the cerebral organoids or 2D progenitors infected with ZIKV (Figures 5D, 5H; Figures 6B; Figures S5D, S5E), cells positive for ZIKV, cell specific markers SOX2, TBR2, CTIP2, LHX2, OLIG2, or ISL1, and cell death marker cICASP3 were counted and represented as percentage of all cells surveyed. To measure organoid cell death and size two weeks after ZIKV infection (Fig. 5F), cerebral organoids were stained with 25  $\mu$ g/ml propidium iodide (PI) and 5  $\mu$ g/ml Hoechst 33258 at RT for 5 minutes, washed with PBS five times, and then fixed in 4% PFA in PBS for 20 minutes on ice. Organoids were then washed with PBS five times, and placed individually into wells of a 384-well plate (VWR, Greiner bio-one Cat#89047-270) for imaging and size analysis. Images were taken using ImageXpress XL and analyzed using ImageXpress analysis software to measure PI and Hoechst intensity, organoid area, and organoid perimeter.

## SUPPLEMENTAL REFERENCES

- Cai, D.J., Aharoni, D., Shuman, T., Shobe, J., Biane, J., Song, W., Wei, B., Veshkini, M., La-Vu, M., Lou, J., *et al.* (2016). A shared neural ensemble links distinct contextual memories encoded close in time. *Nature* 534, 115-118.
- Diaz Perez, S.V., Kim, R., Li, Z., Marquez, V.E., Patel, S., Plath, K., and Clark, A.T. (2012). Derivation of new human embryonic stem cell lines reveals rapid epigenetic progression in vitro that can be prevented by chemical modification of chromatin. *Hum Mol Genet* 21, 751-764.
- Dobin, A., Davis, C.A., Schlesinger, F., Drenkow, J., Zaleski, C., Jha, S., Batut, P., Chaisson, M., and Gingeras, T.R. (2013). STAR: ultrafast universal RNA-seq aligner. *Bioinformatics* 29, 15-21.
- Karumbayaram, S., Lee, P., Azghadi, S.F., Cooper, A.R., Patterson, M., Kohn, D.B., Pyle, A., Clark, A., Byrne, J., Zack, J.A., *et al.* (2012). From skin biopsy to neurons through a pluripotent intermediate under Good Manufacturing Practice protocols. *Stem Cells Transl Med* 1, 36-43.
- Kong, J.H., Yang, L., Dessaud, E., Chuang, K., Moore, D.M., Rohatgi, R., Briscoe, J., and Novitch, B.G. (2015). Notch activity modulates the responsiveness of neural progenitors to sonic hedgehog signaling. *Developmental cell* 33, 373-387.
- Lancaster, M.A., and Knoblich, J.A. (2014). Generation of cerebral organoids from human pluripotent stem cells. *Nat Protoc* 9, 2329-2340.
- Lancaster, M.A., Renner, M., Martin, C.A., Wenzel, D., Bicknell, L.S., Hurles, M.E., Homfray, T., Penninger, J.M., Jackson, A.P., and Knoblich, J.A. (2013). Cerebral organoids model human brain development and microcephaly. *Nature* 501, 373-379.
- Law, C.W., Chen, Y., Shi, W., and Smyth, G.K. (2014). Voom: precision weights unlock linear model analysis tools for RNA-seq read counts. *Genome biology* 15, R29.
- Lowry, W.E., Richter, L., Yachechko, R., Pyle, A.D., Tchieu, J., Sridharan, R., Clark, A.T., and Plath, K. (2008). Generation of human induced pluripotent stem cells from dermal fibroblasts. *Proc Natl Acad Sci U S A* 105, 2883-2888.
- Robinson, M.D., McCarthy, D.J., and Smyth, G.K. (2010). edgeR: a Bioconductor package for differential expression analysis of digital gene expression data. *Bioinformatics* 26, 139-140.
- Schneider, C.A., Rasband, W.S., and Eliceiri, K.W. (2012). NIH Image to ImageJ: 25 years of image analysis. *Nat Methods* 9, 671-675.
- Thomson, J.A., Itskovitz-Eldor, J., Shapiro, S.S., Waknitz, M.A., Swiergiel, J.J., Marshall, V.S., and Jones, J.M. (1998). Embryonic stem cell lines derived from human blastocysts. *Science* 282, 1145-1147.
- Tripathi, S., Pohl, M.O., Zhou, Y., Rodriguez-Frandsen, A., Wang, G., Stein, D.A., Moulton, H.M., DeJesus, P., Che, J., Mulder, L.C., *et al.* (2015). Meta- and Orthogonal Integration of Influenza "OMICS" Data Defines a Role for UBR4 in Virus Budding. *Cell Host Microbe* 18, 723-735.
- Watanabe, M., Kang, Y.-J., Davies, L.M., Meghpara, S., Lau, K., Chung, C.-Y., Kathiriya, J., Hadjantonakis, A.-K., and Monuki, E.S. (2012). BMP4 sufficiency to induce choroid plexus epithelial fate from embryonic stem cell-derived neuroepithelial progenitors. *Journal of Neuroscience* 32, 15934-15945.
- Yaksi, E., and Friedrich, R.W. (2006). Reconstruction of firing rate changes across neuronal populations by temporally deconvolved Ca<sup>2+</sup> imaging. *Nat Methods* 3, 377-383.
